# Supplementary material for: High GUD Incidence in the Early 20th Century Created a Particularly Permissive Time Window for the Origin and Initial Spread of Epidemic HIV Strains
Source: PLoS One. 2010 Apr 1;5(4):e9936. doi: 10.1371/journal.pone.0009936 (PMC2848574; doi:10.1371/journal.pone.0009936)
Supplement: Dataset S1 — Circumcision classes and frequencies in Central and West African cities. (0.67 MB XLS) [file pone.0009936.s010.xls]

## Sheet: Charts
High GUD incidence in the early 20th century created a particularly permissive time window for the origin and initial spread of epidemic HIV strains
João Dinis de Sousa1*, Viktor Müller2, Philippe Lemey1, Anne-Mieke Vandamme1,3
1 Laboratory for Clinical and Evolutionary Virology, Rega Institute for Medical Research, Katholieke Universiteit Leuven, Leuven, Belgium; 2 Institute of Biology, Eötvös Loránd University, Budapest, Hungary; 3 Centro de Malária e Outras Doenças Tropicais, Instituto de Higiene e Medicina Tropical, Universidade Nova de Lisboa, Lisboa, Portugal
* Corresponding author. E-mail: joao.sousa@rega.kuleuven.be							joao.sousa@rega.kuleuven.be
SUPPLEMENTARY DATASET S1
CONTROL OF PARAMETERS AND GENERATION OF CHARTS OF CIRCUMCISION RATE ESTIMATES
PARAMETERS USED FOR ESTIMATES OF CIRCUMCISION BASED ON ETHNOGRAPHIES																						EXPLANATION OF THE COLUMNS LABELLED "BASIS OF CIRCUMCISION ESTIMATE" IN THE OTHER SHEET'S TABLES
Acronym			Values		Explanation																	The column "Ref.Time" contains the estimated year of a major shift in circumcision practice (e.g., Adoption, Generalization). For many groups, the ethnographers provide an approximate date. Often, they provide also the rough temporal order of adoptions of groups occuppying the same region. Based on this, and on the inferred waves of adoptions, led by imitation, we estimated a date of adoption or …
GenTimeAdopt			45		Years elapsed until generalization after adoption (e.g., by imitation)
GenTimeFFG			30		Years elapsed until generalization after the time when it's described as far from general
			Lower	Upper	Estimated circumcision rates (%) in adults (>20) when circumcision is...
Absent			0	5	Described as absent
CurrGeneral			97	99	Currently generalized (used as end value of a generalization process)
GenPuberty			97	99	Culturally mandatory and practiced up to the end of puberty or early adolescence
LateAdoles			75	85	Very often practiced in late adolescence or young adulthood
StartAdoption			0	20	Was adopted at this time
FarFromGen			40	60	Described as far from general, or with important within-group regional inconsistencies
MajPuberty			65	85	Favored and done usually up to puberty, but many exceptions expected from foreign influence
These charts appear in the main article. You can recalculate them by changing the parameters above.
Circumcision classes for the charts (they are picked from the countries' sheets)
CL2 class	Color code		Explanation
1	dark blue		Circumcision is either generalized up to puberty, or its adoption/generalization/move to childhood by the group started more than 45 years before
2	blue		Circumcision was, less than 45 years before, done in late adolescence/young adulthood by many men
3	green		Adoption/generalization of circumcision by the group started between 30 and 45 years before
4	pink		Adoption/generalization of circumcision by the group started between 15 and 30 years before
5	orange		Adoption/generalization of circumcision by the group started less than 15 years before
6	red		Circumcision is absent in the group
7	gray		Other situations
Central African cities												West African cities
CL2 class:			7	1	2	3	4	5	6			CL2 class:			7	1	2	3	4	5	6
Bangui 1960			7	93	0	0	0	0	0			Bissau 1950			0	4569	0	0	8858	2658	2961
Bangui 1949			1744	31645	0	4337	0	0	0			Conakry 1950			7300	18700	20000	0	0	0	0
Yaoundé 1957			4200	16900	31600	0	0	0	0			Freetown 1963			0	119591	3865	4461	0	0	0
Douala 1965			6.6	93.4	0	0	0	0	0			Freetown 1953			0	75500	2500	0	7000	0	0
Libreville 1953			726	10992	452	1199	0	0	0			Monrovia 1958			0	39750	0	13250	0	0	0
Brazzaville 1950			0	100	0	0	0	0	0			Bouaké 1969			0	71864	0	0	25064	6864	0
Kinshasa 1958			346	211660	5250.23	22586.4	0	177.48	825.84			Bouaké 1958			0	18750	0	10100	0	11550	0
												Abidjan 1975			21785	326447	0	0	368664	186034	0
												Abidjan 1955			7100	30299	0	7830	0	57770	6870
Bangui 1931			4.62281	12.1799	0	71.7012	11.4961	0	0
Douala 1935			1302	13593	5034	4531	19402	0	0
Douala 1925			1.92279	16.2832	7.4342	1.46646	6.69137	66.202	0			Bissau 1940			0	13.48	0	0	26.13	51.65	8.74
Libreville 1934			5.43047	82.1228	3.38096	0.0972399	0.23936	8.72915	0			Conakry 1936			666	5919	4693	0	0	0	0
Brazzaville 1932			9	14375	34	829	476	195	0			Conakry 1923			0	7824	4926	0	1000	0	250
Brazzaville 1919			0.0565398	85.218	0.213595	5.08858	5.20794	4.21535	0			Freetown 1931			0	49448	1450	0	0	4460	0
Kinshasa 1927			118	12545.9	522.3	977.89	3019.28	7555	169.63			Freetown 1921			0	38052	1346	0	0	0	4744
Kinshasa 1919			118	12518.6	522.3	124.82	2462.36	8992.29	169.63			Freetown 1911			0	31228	1311	0	0	0	1551
Kinshasa 1912			2	364.03	58.75	0.42	10.06	118.29	93.45			Monrovia 1939			0	9680	0	0	0	2320	0
												Bouaké 1931			0	700	0	0	0	200	4230
												Abidjan 1936			0	2916	0	0	2552	136	18258
Circumcision rates for the charts (they are picked from the countries' sheets)
	Kinshasa					Brazzaville					Libreville					Douala					Bangui					Yaoundé					Abidjan					Bouaké					Monrovia					Freetown
	Lower	Upper				Lower	Upper				Lower	Upper				Lower	Upper				Lower	Upper				Lower	Upper				Lower	Upper				Lower	Upper				Lower	Upper				Lower	Upper
1910
1911																																														91.7407	94.1849	92.9628	1.22207
1912	71.4861	78.5613	75.0237	3.5376	3.5376																																											#N/A
1913			#N/A																																													#N/A
1914			#N/A																																													#N/A
1915			#N/A																																													#N/A
1916			#N/A																																													#N/A
1917			#N/A																																													#N/A
1918			#N/A																																													#N/A
1919	73.4618	82.5447	78.0032	4.54144	4.54144	91.5881	94.8886	93.2383	1.65025	1.65025																																						#N/A
1920			#N/A					#N/A																																								#N/A
1921			#N/A					#N/A																																						85.9268	89.3424	87.6346	1.7078
1922			#N/A					#N/A																																								#N/A
1923			#N/A					#N/A																																								#N/A
1924			#N/A					#N/A																																								#N/A
1925			#N/A					#N/A								76.1037	89.1216	82.6127	6.50897	6.50897																												#N/A
1926			#N/A					#N/A										#N/A																														#N/A
1927	79.6262	86.8605	83.2433	3.61715	3.61715			#N/A										#N/A																														#N/A
1928			#N/A					#N/A										#N/A																														#N/A
1929			#N/A					#N/A										#N/A																														#N/A
1930			#N/A					#N/A										#N/A																														#N/A
1931			#N/A					#N/A										#N/A			86.691	90.6397	88.6654	1.97438	1.97438											15.2027	38.5429	26.8728	11.6701	11.6701						89.8621	93.2516	91.5569	1.69477
1932			#N/A			94.9496	97.4106	96.1801	1.23051	1.23051								#N/A					#N/A															#N/A										#N/A
1933			#N/A					#N/A										#N/A					#N/A															#N/A										#N/A
1934			#N/A					#N/A			92.7551	96.2755	94.5153	1.7602	1.7602			#N/A					#N/A															#N/A										#N/A
1935			#N/A					#N/A					#N/A			87.3927	94.3327	90.8627	3.47	3.47			#N/A															#N/A										#N/A
1936			#N/A					#N/A					#N/A					#N/A					#N/A								19.1931	33.6378	26.4155	7.22236	7.22236			#N/A										#N/A
1937			#N/A					#N/A					#N/A					#N/A					#N/A										#N/A					#N/A										#N/A
1938			#N/A					#N/A					#N/A					#N/A					#N/A										#N/A					#N/A										#N/A
1939			#N/A					#N/A					#N/A					#N/A					#N/A										#N/A					#N/A			84.081	88.4784	86.2797	2.19867	2.19867			#N/A
1940			#N/A					#N/A					#N/A					#N/A					#N/A										#N/A					#N/A					#N/A					#N/A
1941			#N/A					#N/A					#N/A					#N/A					#N/A										#N/A					#N/A					#N/A					#N/A
1942			#N/A					#N/A					#N/A					#N/A					#N/A										#N/A					#N/A					#N/A					#N/A
1943			#N/A					#N/A					#N/A					#N/A					#N/A										#N/A					#N/A					#N/A					#N/A
1944			#N/A					#N/A					#N/A					#N/A					#N/A										#N/A					#N/A					#N/A					#N/A
1945			#N/A					#N/A					#N/A					#N/A					#N/A										#N/A					#N/A					#N/A					#N/A
1946			#N/A					#N/A					#N/A					#N/A					#N/A										#N/A					#N/A					#N/A					#N/A
1947			#N/A					#N/A					#N/A					#N/A					#N/A										#N/A					#N/A					#N/A					#N/A
1948			#N/A					#N/A					#N/A					#N/A					#N/A										#N/A					#N/A					#N/A					#N/A
1949			#N/A					#N/A					#N/A					#N/A			93.8119	96.4182	95.115	1.30317	1.30317								#N/A					#N/A					#N/A					#N/A
1950			#N/A			95.6553	98.3333	96.9943	1.339	1.339			#N/A					#N/A					#N/A										#N/A					#N/A					#N/A					#N/A
1951			#N/A					#N/A					#N/A					#N/A					#N/A										#N/A					#N/A					#N/A					#N/A
1952			#N/A					#N/A					#N/A					#N/A					#N/A										#N/A					#N/A					#N/A					#N/A
1953			#N/A					#N/A			95.964	98.4529	97.2084	1.24447	1.24447			#N/A					#N/A										#N/A					#N/A					#N/A			93.9822	96.5422	95.2622	1.28
1954			#N/A					#N/A					#N/A					#N/A					#N/A										#N/A					#N/A					#N/A					#N/A
1955			#N/A					#N/A					#N/A					#N/A					#N/A								49.6597	61.9596	55.8096	6.14995	6.14995			#N/A					#N/A					#N/A
1956			#N/A					#N/A					#N/A					#N/A					#N/A										#N/A					#N/A					#N/A					#N/A
1957			#N/A					#N/A					#N/A					#N/A					#N/A			95.6452	98.2827	96.9639	1.31879	1.31879			#N/A					#N/A					#N/A					#N/A
1958	96.2848	98.3741	97.3294	1.04463	1.04463			#N/A					#N/A					#N/A					#N/A					#N/A					#N/A			68.9736	76.8548	72.9142	3.94059	3.94059	90.5333	93.7333	92.1333	1.6	1.6			#N/A
1959			#N/A					#N/A					#N/A					#N/A					#N/A					#N/A					#N/A					#N/A					#N/A					#N/A
1960			#N/A					#N/A					#N/A					#N/A			94.83	98.17	96.5	1.67	1.67			#N/A					#N/A					#N/A					#N/A					#N/A
1961			#N/A					#N/A					#N/A					#N/A					#N/A					#N/A					#N/A					#N/A					#N/A					#N/A
1962			#N/A					#N/A					#N/A					#N/A					#N/A					#N/A					#N/A					#N/A					#N/A					#N/A
1963			#N/A					#N/A					#N/A					#N/A					#N/A					#N/A					#N/A					#N/A					#N/A			96.4738	98.5714	97.5226	1.04882
1964			#N/A					#N/A					#N/A					#N/A					#N/A					#N/A					#N/A					#N/A					#N/A					#N/A
1965			#N/A					#N/A					#N/A			95.663	98.191	96.927	1.264	1.264			#N/A					#N/A					#N/A					#N/A					#N/A					#N/A
1966			#N/A					#N/A					#N/A					#N/A					#N/A					#N/A					#N/A					#N/A					#N/A					#N/A
1967			#N/A					#N/A					#N/A					#N/A					#N/A					#N/A					#N/A					#N/A					#N/A					#N/A
1968			#N/A					#N/A					#N/A					#N/A					#N/A					#N/A					#N/A					#N/A					#N/A					#N/A
1969			#N/A					#N/A					#N/A					#N/A					#N/A					#N/A					#N/A			77.6989	84.1778	80.9384	3.23943	3.23943			#N/A					#N/A
1970			#N/A					#N/A					#N/A					#N/A					#N/A					#N/A					#N/A					#N/A					#N/A					#N/A
1971			#N/A					#N/A					#N/A					#N/A					#N/A					#N/A					#N/A					#N/A					#N/A					#N/A
1972			#N/A					#N/A					#N/A					#N/A					#N/A					#N/A					#N/A					#N/A					#N/A					#N/A
1973			#N/A					#N/A					#N/A					#N/A					#N/A					#N/A					#N/A					#N/A					#N/A					#N/A
1974			#N/A					#N/A					#N/A					#N/A					#N/A					#N/A					#N/A					#N/A					#N/A					#N/A
1975			#N/A					#N/A					#N/A					#N/A					#N/A					#N/A			67.5824	76.8894	72.2359	4.65352	4.65352			#N/A					#N/A					#N/A
1976			#N/A					#N/A					#N/A					#N/A					#N/A					#N/A					#N/A					#N/A					#N/A					#N/A
1977			#N/A					#N/A					#N/A					#N/A					#N/A					#N/A					#N/A					#N/A					#N/A					#N/A
1978			#N/A					#N/A					#N/A					#N/A					#N/A					#N/A					#N/A					#N/A					#N/A					#N/A
1979			#N/A					#N/A					#N/A					#N/A					#N/A					#N/A					#N/A					#N/A					#N/A					#N/A
1980			#N/A					#N/A					#N/A					#N/A					#N/A					#N/A					#N/A					#N/A					#N/A					#N/A
1981			#N/A					#N/A					#N/A					#N/A					#N/A					#N/A					#N/A					#N/A					#N/A					#N/A
1982			#N/A					#N/A					#N/A					#N/A					#N/A					#N/A					#N/A					#N/A					#N/A					#N/A
1983			#N/A					#N/A					#N/A					#N/A					#N/A					#N/A					#N/A					#N/A					#N/A					#N/A
1984			#N/A					#N/A					#N/A					#N/A					#N/A					#N/A					#N/A					#N/A					#N/A					#N/A
1985			#N/A					#N/A					#N/A					#N/A					#N/A					#N/A					#N/A					#N/A					#N/A					#N/A
1986			#N/A					#N/A					#N/A					#N/A					#N/A					#N/A					#N/A					#N/A					#N/A					#N/A
1987			#N/A					#N/A					#N/A					#N/A					#N/A					#N/A					#N/A					#N/A					#N/A					#N/A
1988			#N/A					#N/A					#N/A					#N/A					#N/A					#N/A					#N/A					#N/A					#N/A					#N/A
1989			#N/A					#N/A					#N/A					#N/A					#N/A					#N/A					#N/A					#N/A					#N/A					#N/A
1990			#N/A					#N/A					#N/A					#N/A					#N/A					#N/A					#N/A					#N/A					#N/A					#N/A
1991			#N/A					#N/A					#N/A					#N/A					#N/A					#N/A					#N/A					#N/A					#N/A					#N/A
1992			#N/A					#N/A					#N/A					#N/A					#N/A					#N/A					#N/A					#N/A					#N/A					#N/A
1993			#N/A					#N/A					#N/A					#N/A					#N/A					#N/A					#N/A					#N/A					#N/A					#N/A
1994			#N/A					#N/A					#N/A					#N/A					#N/A					#N/A					#N/A					#N/A					#N/A					#N/A
1995			#N/A					#N/A					#N/A					#N/A					#N/A					#N/A					#N/A					#N/A					#N/A					#N/A
1996			#N/A					#N/A					#N/A					#N/A					#N/A					#N/A					#N/A					#N/A					#N/A					#N/A
1997			#N/A					#N/A					#N/A					#N/A					#N/A					#N/A					#N/A					#N/A					#N/A					#N/A
1998			#N/A					#N/A					#N/A					#N/A					#N/A					#N/A					#N/A					#N/A					#N/A					#N/A
1999			#N/A					#N/A					#N/A					#N/A					#N/A					#N/A					#N/A					#N/A					#N/A					#N/A
2000			#N/A					#N/A					#N/A					#N/A					#N/A					#N/A					#N/A					#N/A					#N/A					#N/A
2001			#N/A					#N/A					#N/A					#N/A					#N/A					#N/A					#N/A					#N/A					#N/A					#N/A
2002			#N/A					#N/A					#N/A					#N/A					#N/A					#N/A					#N/A					#N/A					#N/A					#N/A
2003			#N/A					#N/A					#N/A					#N/A					#N/A					#N/A					#N/A					#N/A					#N/A					#N/A
2004			#N/A					#N/A			97	98	97.5	0.5	0.5	94	96	95	1	1	94	98	96	2	2	97	99	98	1	1			#N/A					#N/A					#N/A			98	99	98.5	0.5
2005			#N/A			98	99	98.5	0.5	0.5																							#N/A					#N/A					#N/A
2006			#N/A																												94	98	96	2	2	94	98	96	2	2			#N/A
2007	97	98	97.5	0.5	0.5																																				98	99	98.5	0.5	0.5
2008
2009
2010
[truncated: 3 more columns]

## Sheet: DRC
DEMOCRATIC REPUBLIC OF CONGO / BELGIAN CONGO
Tables of ethnic composition of cities and estimates of circumcision classes and circumcision rates
		VARIABLES
		45		GenTimeAdopt
		30		GenTimeFFG
		Lower	Upper
		0	5	Absent
		97	99	CurrGeneral
		97	99	GenPuberty
		75	85	LateAdoles
		0	20	StartAdoption
		40	60	FarFromGen
		65	85	MajPuberty
TABLE DRC-1
ESTIMATES OF CIRCUMCISION CLASSES AND CIRCUMCISION FREQUENCIES (%) IN THE ETHNIC GROUPS OF THE BELGIAN CONGO
			1912			1919			1927			1958	Basis of circumcision estimate (see explanation in the Charts sheet)
Ethnic group	Circ. CL1	Lower	Upper	Circ. CL1	Lower	Upper	Circ. CL1	Lower	Upper	Circ. CL1	Lower	Upper	Ref.Time	Process	Initial situation	References
Kongo	1	97	99	1	97	99	1	97	99	1	97	99			GenPuberty	Torday1928, VanWing1938, Frazer1938, Bruel1935, Laman1957, Gray1999, Hewlett
Manianga	1	97	99	1	97	99	1	97	99	1	97	99			GenPuberty	Torday1928, Frazer1938, Bruel1935, Laman1957, Gray1999, Hewlett
Yombe	1	97	99	1	97	99	1	97	99	1	97	99			GenPuberty	Torday1928, Frazer1938, Bruel1935, Laman1957, Gray1999, Hewlett
Madimba	1	97	99	1	97	99	1	97	99	1	97	99			GenPuberty	Torday1928, Frazer1938, Bruel1935, Laman1957, Gray1999, Hewlett
San Salvador	5	65	85	5	65	85	5	72.4667	88.2667	3	97	99	1920	Generalization	MajPuberty	Bentley1887, Weeks1914, FerreiraDiniz1918, VanWing1938, Jensen1933, Frazer1938, Frobenius1929, Berlin1996
Teke	1	97	99	1	97	99	1	97	99	1	97	99			GenPuberty	Guiral1886, Courboin1904, Jensen1933, Baumann1962, Bruel1935, Frobenius1929, Gray1999, Hewlett
Yaka	1	97	99	1	97	99	1	97	99	1	97	99			GenPuberty	Torday1906, Baumann1962, Hoover1978, Frobenius1929
Suku	1	97	99	1	97	99	1	97	99	1	97	99			GenPuberty	Baumann1962, Gray1999
Pende	1	97	99	1	97	99	1	97	99	1	97	99			GenPuberty	Baumann1962, Hoover1978
Soonde	1	97	99	1	97	99	1	97	99	1	97	99			GenPuberty	Baumann1962
Mbala	5	53.3	69.1	5	66.6	78.2	4	81.8	88.6	2	97	99	1905	Generalization	FarFromGen	Torday1906, Torday1907
Yans	1	97	99	1	97	99	1	97	99	1	97	99			GenPuberty	Jensen1933, Gray1999, Hewlett
Chokwe	1	97	99	1	97	99	1	97	99	1	97	99			GenPuberty	Zaborowski1896, Jensen1933, Borgonjon1945, Hoover1978
Western Lunda	1	97	99	1	97	99	1	97	99	1	97	99			GenPuberty	Frazer1938, Jensen1933, Frobenius1929, Turner1969, Hoover1978
Luba-Kasai	1	97	99	1	97	99	1	97	99	1	97	99			GenPuberty	Jensen1933, Baumann1962, Frobenius1929
Mbuund	1	97	99	1	97	99	1	97	99	1	97	99			GenPuberty	Janssens1912, Jensen1933
Lele	1	97	99	1	97	99	1	97	99	1	97	99			GenPuberty	Jensen1933, Hewlett
Kete	1	97	99	1	97	99	1	97	99	1	97	99			GenPuberty	Baumann1962, Gray1999
Salampasu	5	62.8	75.6	4	76.1	84.7	4	91.3	95.1	2	97	99	1900	Generalization	FarFromGen	Frazer1938, Hoover1978, Frobenius1929
Dzing	1	97	99	1	97	99	1	97	99	1	97	99			GenPuberty	Janssens1912, Jensen1933
Kuba	1	97	99	1	97	99	1	97	99	1	97	99			GenPuberty	Jensen1933, Gray1999
Tetela	1	97	99	1	97	99	1	97	99	1	97	99			GenPuberty	Baumann1962, Hewlett
Kutshu	1	97	99	1	97	99	1	97	99	1	97	99			GenPuberty	Baumann1962, Gray1999, Frobenius1929
Hamba-Sankuru	1	97	99	1	97	99	1	97	99	1	97	99			GenPuberty	Schmitz1912, Frobenius1929
Songye	1	97	99	1	97	99	1	97	99	1	97	99			GenPuberty	Baumann1962, Gray1999
Mongo-Nkundu	7	75	85	7	75	85	7	80.1333	88.2667	7	97	99	1920	Advance to childhood	LateAdoles	Hulstaert1938, Baumann1962, Jensen1933, Frobenius1929, Gray1999, Hewlett
Mongo-Ngando	8	0	14.7333	5	8.62222	27.0222	5	25.8667	41.0667	3	92.6889	95.4889	1915	Adoption	Absent	Jensen1933, Frobenius1929
Ngombe/ Doko	5	62.8	75.6	4	76.1	84.7	4	91.3	95.1	2	97	99	1900	Generalization	FarFromGen	VanOverbergh1907, Jensen1933, Burssens1958, Wolfe1961
Ntomba/ Bobangi	1	97	99	1	97	99	1	97	99	1	97	99			GenPuberty	Weeks1909, Gilliard1928, Jensen1933, Burssens1958, Baumann1962
Boyela/ Bosaka	8	0	14.7333	5	8.62222	27.0222	5	25.8667	41.0667	3	92.6889	95.4889	1915	Adoption	Absent	Baumann1962, Gray1999, Frobenius1929
Dengese	1	97	99	1	97	99	1	97	99	1	97	99			GenPuberty	Jensen1933, Hewlett
Sakata	1	97	99	1	97	99	1	97	99	1	97	99			GenPuberty	Jensen1933, Frobenius1929, Gray1999, Hewlett
Yamongeri	5	40	60	5	47.6	65.2	5	62.8	75.6	3	97	99	1915	Generalization	FarFromGen	Jensen1933, Frobenius1929
Mbesa	5	53.3	69.1	5	66.6	78.2	4	81.8	88.6	2	97	99	1905	Generalization	FarFromGen	Frobenius1929, Gray1999, Hewlett
Topoke	5	53.3	69.1	5	66.6	78.2	4	81.8	88.6	2	97	99	1905	Generalization	FarFromGen	Baumann1962, Frobenius1929, Gray1999, Hewlett
Ngbandi/ Yakoma	8	0	14.7333	5	8.62222	27.0222	5	25.8667	41.0667	3	92.6889	95.4889	1915	Adoption	Absent	Delafosse1930, Burssens1958, Jensen1933, Frobenius1929, Tanghe1948, Baumann1962, Murdock1967, Gray1999, Hewlett
Ngbaka	1	97	99	1	97	99	1	97	99	1	97	99			GenPuberty	Jensen1933, Burssens1958, Moiya1983, Gray1999
Ngiri/ Boloki	1	97	99	1	97	99	1	97	99	1	97	99			GenPuberty	Weeks1909, Jensen1933, Burssens1958, Hewlett
Mbanja	1	97	99	1	97	99	1	97	99	1	97	99			GenPuberty	Burssens1958, Moiya1983, Gray1999
Budja/ Poto	1	97	99	1	97	99	1	97	99	1	97	99			GenPuberty	Jensen1933, Frobenius1929
Ndunga	1	97	99	1	97	99	1	97	99	1	97	99			GenPuberty	Jensen1933, Frobenius1929
Banziri	8	0	14.7333	5	8.62222	27.0222	5	25.8667	41.0667	3	92.6889	95.4889	1915	Adoption	Absent	Landor1907, Baumann1962, Frobenius1929, Hewlett
Buraka	8	0	14.7333	5	8.62222	27.0222	5	25.8667	41.0667	3	92.6889	95.4889	1915	Adoption	Absent	Baumann1962, Frobenius1929
Langwasi	4	58.2	67.4	3	73.2889	79.6889	3	90.5333	93.7333	2	97	99	1885	Adoption	Absent	Delafosse1930, Bruel1935, Frobenius1929
Gobu/ Mono	8	0	14.7333	5	8.62222	27.0222	5	25.8667	41.0667	3	92.6889	95.4889	1915	Adoption	Absent	Bruel1935, Frobenius1929, Baumann1962, Burssens1958
Lobala	1	97	99	1	97	99	1	97	99	1	97	99			GenPuberty	Burssens1958
Bali	8	0	5	8	0	5	8	0	5	8	0	5			Absent	VanGeluwe1960, Baumann1962
Kumu	4	47.4222	58.6222	4	62.5111	70.9111	3	79.7556	84.9556	2	97	99	1890	Adoption	Absent	Friedrichs1924, Jensen1933, DeMahieu1986, Gray1999, Hewlett
Mangbetu	1	97	99	1	97	99	1	97	99	1	97	99			GenPuberty	Friedrichs1924, Gray1999, Hewlett
Malele/ Popoi	5	15.0889	32.2889	5	30.1778	44.5778	4	47.4222	58.6222	2	97	99	1905	Adoption	Absent	Halkim1911, Frobenius1929, Gray1999, Hewlett
Lombi	4	47.4222	58.6222	4	62.5111	70.9111	3	79.7556	84.9556	2	97	99	1890	Adoption	Absent	Frobenius1929
Mba/ Amadi	1	97	99	1	97	99	1	97	99	1	97	99			GenPuberty	Frobenius1929
Lokele	1	97	99	1	97	99	1	97	99	1	97	99			GenPuberty	Jensen1933, Gray1999, Hewlett
Lengola/ Mbole	1	97	99	1	97	99	1	97	99	1	97	99			GenPuberty	Jensen1933, Dedave1957, Hewlett
Angba	5	25.8667	41.0667	4	40.9556	53.3556	4	58.2	67.4	2	97	99	1900	Adoption	Absent	Halkim1911, Frobenius1929
Zande-Avungara	5	10.7778	28.7778	5	25.8667	41.0667	4	43.1111	55.1111	2	97	99	1907	Adoption	Absent	Jensen1933, Bruel1935, Calonne-Beaufaict1921, Friedrichs1924, Baumann1962, Frobenius1929, Gray1999, Hewlett
Logo/ Madi/ Lugbara	5	40	60	5	40	60	5	40	60	5	40	60			FarFromGen	Frobenius1929, Gray1999, Hewlett
Mamvu/ Lese/ Mangutu	5	25.8667	41.0667	4	40.9556	53.3556	4	58.2	67.4	2	97	99	1900	Adoption	Absent	Baumann1962, Frobenius1929, Gray1999, Hewlett
Abarambo	3	68.9778	76.1778	3	84.0667	88.4667	2	97	99	2	97	99	1880	Adoption	Absent	Friedrichs1924, Gray1999, Hewlett
Bangba	5	25.8667	41.0667	4	40.9556	53.3556	4	58.2	67.4	2	97	99	1900	Adoption	Absent	Frobenius1929
Zande-Abandiya	4	47.4222	58.6222	4	62.5111	70.9111	3	79.7556	84.9556	2	97	99	1890	Adoption	Absent	Jensen1933, Bruel1935, Calonne-Beaufaict1921, Friedrichs1924, Baumann1962, Frobenius1929, Gray1999, Hewlett
Babwa	5	15.0889	32.2889	5	30.1778	44.5778	4	47.4222	58.6222	2	97	99	1905	Adoption	Absent	Halkim1911, Friedrichs1924, Jensen1933
Binza	1	97	99	1	97	99	1	97	99	1	97	99			GenPuberty	Halkim1911
Nzakara	8	0	14.7333	5	8.62222	27.0222	5	25.8667	41.0667	3	92.6889	95.4889	1915	Adoption	Absent	Jensen1933, Frobenius1929
Kare	5	25.8667	41.0667	4	40.9556	53.3556	4	58.2	67.4	2	97	99	1900	Adoption	Absent	Frobenius1929
Metoko	1	97	99	1	97	99	1	97	99	1	97	99			GenPuberty	Dedave1957, Hewlett
Ombo	1	97	99	1	97	99	1	97	99	1	97	99			GenPuberty	Frobenius1929
Ndaka/ Mbo/ Pere	5	40	60	5	40	60	5	53.3	69.1	3	97	99	1920	Generalization	FarFromGen	VanGeluwe1960, Murdock1967, Gray1999, Hewlett
Budu	3	68.9778	76.1778	3	84.0667	88.4667	2	97	99	2	97	99	1880	Adoption	Absent	Friedrichs1924, VanGeluwe1960, Baumann1962, Gray1999, Hewlett
Nande	8	0	14.7333	5	8.62222	27.0222	5	25.8667	41.0667	3	92.6889	95.4889	1915	Adoption	Absent	Frobenius1929, Gray1999, Hewlett
Lika	3	68.9778	76.1778	3	84.0667	88.4667	2	97	99	2	97	99	1880	Adoption	Absent	VanGeluwe1960, Friedrichs1924, Frobenius1929, Hewlett
Forest Bira	4	47.4222	58.6222	4	62.5111	70.9111	3	79.7556	84.9556	2	97	99	1890	Adoption	Absent	Friedrichs1924, Frobenius1929, Gray1999, Hewlett
Plains Bira	5	25.8667	41.0667	4	40.9556	53.3556	4	58.2	67.4	2	97	99	1900	Adoption	Absent	Friedrichs1924, Frobenius1929, Gray1999, Hewlett
Lendu	5	40	60	5	40	60	5	53.3	69.1	3	97	99	1920	Generalization	FarFromGen	Frobenius1929, Gray1999, Hewlett
Alur	8	0	5	8	0	5	8	0	5	8	0	5			Absent	Gray1999, Hewlett
Lega	1	97	99	1	97	99	1	97	99	1	97	99			GenPuberty	Gray1999, Hewlett
Songola	1	97	99	1	97	99	1	97	99	1	97	99			GenPuberty	Gray1999, Hewlett
Bembe/ Boyo	5	25.8667	41.0667	4	40.9556	53.3556	4	58.2	67.4	2	97	99	1900	Adoption	Absent	Frobenius1929, Gray1999
Lamba	8	0	5	8	0	5	8	0	5	8	0	5			Absent	Gray1999
Sanga	5	62.8	75.6	4	76.1	84.7	4	91.3	95.1	2	97	99	1900	Generalization	FarFromGen	Baumann1962, Frobenius1929
Lunda-Ndembu	5	62.8	75.6	4	76.1	84.7	4	91.3	95.1	2	97	99	1900	Generalization	FarFromGen	Frazer1938, Frobenius1929, Jensen1933, Turner1969, Hoover1978
Luba-Katanga	1	97	99	1	97	99	1	97	99	1	97	99			GenPuberty	Jensen1933, Baumann1962, Frobenius1929
Kaonde	8	0	5	8	0	5	8	0	5	8	0	5			Absent	Gray1999
Bemba-Aushi	5	4.31111	23.5111	5	19.4	35.8	4	36.6444	49.8444	2	97	99	1910	Adoption	Absent	Frobenius1929, Gray1999
Bemba-Lomotwa	5	43.8	62.6	5	57.1	71.7	4	72.3	82.1	2	97	99	1910	Generalization	FarFromGen	Frobenius1929, Gray1999
Lala	8	0	5	8	0	5	8	0	5	8	0	5			Absent	Gray1999, Hewlett
Tongwe	8	0	5	8	0	5	8	0	5	8	0	5			Absent	Frobenius1929, Gray1999
Bwile	8	0	5	8	0	5	8	0	5	8	0	5			Absent	Frobenius1929
Kunda	5	43.8	62.6	5	57.1	71.7	4	72.3	82.1	2	97	99	1910	Generalization	FarFromGen	Frobenius1929
Kalanga	5	43.8	62.6	5	57.1	71.7	4	72.3	82.1	2	97	99	1910	Generalization	FarFromGen	Schmitz1912, Frobenius1929
Tabwa	8	0	5	8	0	5	8	0	5	8	0	5			Absent	Frobenius1929
Shi-Havu	8	0	5	8	0	5	8	0	5	8	0	5			Absent	Frobenius1929
Hunde	8	0	5	8	0	5	8	0	5	8	0	5			Absent	Gray1999, Hewlett
Nyanga	5	25.8667	41.0667	4	40.9556	53.3556	4	58.2	67.4	2	97	99	1900	Adoption	Absent	Frobenius1929
Lwena/ Luvale	1	97	99	1	97	99	1	97	99	1	97	99			GenPuberty	Zaborowski1896, Jensen1933, Hoover1978, Gray1999, Hewlett
Table DRC-1. Circumcision classes and circumcision rate estimates for all relevant ethnic groups of the Belgian Congo, calculated for four relevant years. The four rightmost columns show the group-specific information used for calculation, and the references that support it (see explanation in the Charts sheet). Circumcision classes are in the columns labelled "CL1" and are used in some charts of…
TABLE DRC-2
ESTIMATES OF CIRCUMCISION CLASSES AND CIRCUMCISION FREQUENCIES (%) IN THE DISTRICTS OF THE BELGIAN CONGO
		1912				1919				1927				1958
Ethnic group/ region of origin	Weight in district (%)	# of people in Kin.	Circ. CL1	% circumcised		# of people in Kin.	Circ. CL1	% circumcised		# of people in Kin.	Circ. CL1	% circumcised		# of people in Kin.	Circ. CL1	% circumcised
				Lower	Upper			Lower	Upper			Lower	Upper			Lower	Upper
Bas Congo district	100			93.8	97.6	4163		93.8	97.6	4163		94.5467	97.9267	102964		97	99
Kongo	37		1	97	99	1540.31	1	97	99	1540.31	1	97	99	38096.7	1	97	99
Manianga	8		1	97	99	333.04	1	97	99	333.04	1	97	99	8237.12	1	97	99
Yombe	7		1	97	99	291.41	1	97	99	291.41	1	97	99	7207.48	1	97	99
Madimba	20		1	97	99	832.6	1	97	99	832.6	1	97	99	20592.8	1	97	99
San Salvador	10		5	65	85	416.3	5	65	85	416.3	5	72.4667	88.2667	10296.4	3	97	99
Teke	18		1	97	99	749.34	1	97	99	749.34	1	97	99	18533.5	1	97	99
Kwango district	100	33		90.445	94.515	871		92.44	95.88	871		94.72	97.44	32924		97	99
Yaka	38	12.54	1	97	99	330.98	1	97	99	330.98	1	97	99	12511.1	1	97	99
Suku	12	3.96	1	97	99	104.52	1	97	99	104.52	1	97	99	3950.88	1	97	99
Pende	5	1.65	1	97	99	43.55	1	97	99	43.55	1	97	99	1646.2	1	97	99
Soonde	13	4.29	1	97	99	113.23	1	97	99	113.23	1	97	99	4280.12	1	97	99
Mbala	15	4.95	5	53.3	69.1	130.65	5	66.6	78.2	130.65	4	81.8	88.6	4938.6	2	97	99
Yans	10	3.3	1	97	99	87.1	1	97	99	87.1	1	97	99	3292.4	1	97	99
Chokwe	5	1.65	1	97	99	43.55	1	97	99	43.55	1	97	99	1646.2	1	97	99
Western Lunda	2	0.66	1	97	99	17.42	1	97	99	17.42	1	97	99	658.48	1	97	99
Kasai district	100	70		93.238	96.426	580		94.701	97.427	580		96.373	98.571	7749		97	99
Luba-Kasai	29	20.3	1	97	99	168.2	1	97	99	168.2	1	97	99	2247.21	1	97	99
Mbuund	8	5.6	1	97	99	46.4	1	97	99	46.4	1	97	99	619.92	1	97	99
Lele	12	8.4	1	97	99	69.6	1	97	99	69.6	1	97	99	929.88	1	97	99
Kete	12	8.4	1	97	99	69.6	1	97	99	69.6	1	97	99	929.88	1	97	99
Salampasu	11	7.7	5	62.8	75.6	63.8	4	76.1	84.7	63.8	4	91.3	95.1	852.39	2	97	99
Chokwe	10	7	1	97	99	58	1	97	99	58	1	97	99	774.9	1	97	99
Pende	3	2.1	1	97	99	17.4	1	97	99	17.4	1	97	99	232.47	1	97	99
Dzing	4	2.8	1	97	99	23.2	1	97	99	23.2	1	97	99	309.96	1	97	99
Kuba	11	7.7	1	97	99	63.8	1	97	99	63.8	1	97	99	852.39	1	97	99
Sankuru district	100			94.264	97.128	1226		95.328	97.856	1226		96.544	98.688	4240		97	99
Tetela	48		1	97	99	588.48	1	97	99	588.48	1	97	99	2035.2	1	97	99
Kutshu	22		1	97	99	269.72	1	97	99	269.72	1	97	99	932.8	1	97	99
Hamba-Sankuru	5		1	97	99	61.3	1	97	99	61.3	1	97	99	212	1	97	99
Salampasu/Luntu	8		5	62.8	75.6	98.08	4	76.1	84.7	98.08	4	91.3	95.1	339.2	2	97	99
Luba-Kasai	5		1	97	99	61.3	1	97	99	61.3	1	97	99	212	1	97	99
Kuba	6		1	97	99	73.56	1	97	99	73.56	1	97	99	254.4	1	97	99
Songye/Binji	6		1	97	99	73.56	1	97	99	73.56	1	97	99	254.4	1	97	99
Équateur district	100	56		28.624	41.3827	1232		35.0338	49.7298	1232		48.2247	60.086	9063		94.3271	96.8231
Mongo-Nkundu	25	14	7	75	85	308	7	75	85	308	7	80.1333	88.2667	2265.75	7	97	99
Mongo-Ngando	38	21.28	8	0	14.7333	468.16	5	8.62222	27.0222	468.16	5	25.8667	41.0667	3443.94	3	92.6889	95.4889
Doko	8	4.48	5	62.8	75.6	98.56	4	76.1	84.7	98.56	4	91.3	95.1	725.04	2	97	99
Ntomba/Bobangi	5	2.8	1	97	99	61.6	1	97	99	61.6	1	97	99	453.15	1	97	99
Boyela/Bosaka	24	13.44	8	0	14.7333	295.68	5	8.62222	27.0222	295.68	5	25.8667	41.0667	2175.12	3	92.6889	95.4889
Lac Leopold II district	100	25		73.51	79.7693	726		75.1482	82.1042	726		79.6053	85.524	12976		96.1809	98.3329
Mongo-Nkundu	19	4.75	7	75	85	137.94	7	75	85	137.94	7	80.1333	88.2667	2465.44	7	97	99
Mongo-Ngando	19	4.75	8	0	14.7333	137.94	5	8.62222	27.0222	137.94	5	25.8667	41.0667	2465.44	3	92.6889	95.4889
Dengese	18	4.5	1	97	99	130.68	1	97	99	130.68	1	97	99	2335.68	1	97	99
Sakata	9	2.25	1	97	99	65.34	1	97	99	65.34	1	97	99	1167.84	1	97	99
Ntomba/Sengele	15	3.75	1	97	99	108.9	1	97	99	108.9	1	97	99	1946.4	1	97	99
Bobangi	6	1.5	1	97	99	43.56	1	97	99	43.56	1	97	99	778.56	1	97	99
Boma/Yans	10	2.5	1	97	99	72.6	1	97	99	72.6	1	97	99	1297.6	1	97	99
Mpama/Mongo	4	1	7	75	85	29.04	7	75	85	29.04	7	80.1333	88.2667	519.04	7	97	99
Lulonga district	100			31.518	46.4687	338		39.7008	54.8788	338		54.391	65.8837			95.1031	97.4551
Mongo-Ngando	40		8	0	14.7333	135.2	5	8.62222	27.0222	135.2	5	25.8667	41.0667		3	92.6889	95.4889
Ngombe	15		5	62.8	75.6	50.7	4	76.1	84.7	50.7	4	91.3	95.1		2	97	99
Yamongeri	21		5	40	60	70.98	5	47.6	65.2	70.98	5	62.8	75.6		3	97	99
Mongo-Nkundu	14		7	75	85	47.32	7	75	85	47.32	7	80.1333	88.2667		7	97	99
Mbesa	4		5	53.3	69.1	13.52	5	66.6	78.2	13.52	4	81.8	88.6		2	97	99
Boyela/Bosaka	4		8	0	14.7333	13.52	5	8.62222	27.0222	13.52	5	25.8667	41.0667		3	92.6889	95.4889
Topoke	2		5	53.3	69.1	6.76	5	66.6	78.2	6.76	4	81.8	88.6		2	97	99
Bangala district	100	85		59.754	69.0413	2332		66.9636	75.5716	2332		77.0507	83.0347	9239		95.9222	98.1222
Ngombe/Doko	38	32.3	5	62.8	75.6	886.16	4	76.1	84.7	886.16	4	91.3	95.1	3510.82	2	97	99
Ngbandi	25	21.25	8	0	14.7333	583	5	8.62222	27.0222	583	5	25.8667	41.0667	2309.75	3	92.6889	95.4889
Ngbaka	10	8.5	1	97	99	233.2	1	97	99	233.2	1	97	99	923.9	1	97	99
Ngiri/Boloki	13	11.05	1	97	99	303.16	1	97	99	303.16	1	97	99	1201.07	1	97	99
Mbanja	6	5.1	1	97	99	139.92	1	97	99	139.92	1	97	99	554.34	1	97	99
Poto/Budja	8	6.8	1	97	99	186.56	1	97	99	186.56	1	97	99	739.12	1	97	99
Ubangi district	100	28		58.18	65.9493	1219		63.3827	71.8387	1219		71.8413	78.5693	4583		95.5342	97.8062
Ngbaka	38	10.64	1	97	99	463.22	1	97	99	463.22	1	97	99	1741.54	1	97	99
Ngbandi	16	4.48	8	0	14.7333	195.04	5	8.62222	27.0222	195.04	5	25.8667	41.0667	733.28	3	92.6889	95.4889
Ngombe	8	2.24	5	62.8	75.6	97.52	4	76.1	84.7	97.52	4	91.3	95.1	366.64	2	97	99
Banziri	8	2.24	8	0	14.7333	97.52	5	8.62222	27.0222	97.52	5	25.8667	41.0667	366.64	3	92.6889	95.4889
Buraka	3	0.84	8	0	14.7333	36.57	5	8.62222	27.0222	36.57	5	25.8667	41.0667	137.49	3	92.6889	95.4889
Langwasi	8	2.24	4	58.2	67.4	97.52	3	73.2889	79.6889	97.52	3	90.5333	93.7333	366.64	2	97	99
Gobu/Mono	7	1.96	8	0	14.7333	85.33	5	8.62222	27.0222	85.33	5	25.8667	41.0667	320.81	3	92.6889	95.4889
Lobala	12	3.36	1	97	99	146.28	1	97	99	146.28	1	97	99	549.96	1	97	99
Stanleyville district	100	7		50.3969	57.7449	581		57.036	63.152	581		64.6236	69.3316	2586		75.66	78.32
Bali	22	1.54	8	0	5	127.82	8	0	5	127.82	8	0	5	568.92	8	0	5
Kumu	23	1.61	4	47.4222	58.6222	133.63	4	62.5111	70.9111	133.63	3	79.7556	84.9556	594.78	2	97	99
Mangbetu	7	0.49	1	97	99	40.67	1	97	99	40.67	1	97	99	181.02	1	97	99
Malele/Popoi	8	0.56	5	15.0889	32.2889	46.48	5	30.1778	44.5778	46.48	4	47.4222	58.6222	206.88	2	97	99
Lombi	9	0.63	4	47.4222	58.6222	52.29	4	62.5111	70.9111	52.29	3	79.7556	84.9556	232.74	2	97	99
Mba	7	0.49	1	97	99	40.67	1	97	99	40.67	1	97	99	181.02	1	97	99
Lokele/Lumbu	7	0.49	1	97	99	40.67	1	97	99	40.67	1	97	99	181.02	1	97	99
Mbole/Lengola	13	0.91	1	97	99	75.53	1	97	99	75.53	1	97	99	336.18	1	97	99
Angba	4	0.28	5	25.8667	41.0667	23.24	4	40.9556	53.3556	23.24	4	58.2	67.4	103.44	2	97	99
Haut Uele district	100	7		28.866	45.662	243		38.8247	53.7727	243		49.9473	62.8313	612		80.47	87.69
Zande-Avungara	48	3.36	5	10.7778	28.7778	116.64	5	25.8667	41.0667	116.64	4	43.1111	55.1111	293.76	2	97	99
Logo/Madi/Lugbara	29	2.03	5	40	60	70.47	5	40	60	70.47	5	40	60	177.48	5	40	60
Mamvu/Mambutu	7	0.49	5	25.8667	41.0667	17.01	4	40.9556	53.3556	17.01	4	58.2	67.4	42.84	2	97	99
Abarambo	6	0.42	3	68.9778	76.1778	14.58	3	84.0667	88.4667	14.58	2	97	99	36.72	2	97	99
Bangba	5	0.35	5	25.8667	41.0667	12.15	4	40.9556	53.3556	12.15	4	58.2	67.4	30.6	2	97	99
Mangbetu	2	0.14	1	97	99	4.86	1	97	99	4.86	1	97	99	12.24	1	97	99
Mba/Amadi	3	0.21	1	97	99	7.29	1	97	99	7.29	1	97	99	18.36	1	97	99
Bas Uele district	100	7		34.1871	47.5271	1902		47.2282	58.4642	1902		62.5758	70.9638	991		96.7413	98.7893
Zande-Abandiya	34	2.38	4	47.4222	58.6222	646.68	4	62.5111	70.9111	646.68	3	79.7556	84.9556	336.94	2	97	99
Zande-Avungara	15	1.05	5	10.7778	28.7778	285.3	5	25.8667	41.0667	285.3	4	43.1111	55.1111	148.65	2	97	99
Babwa	23	1.61	5	15.0889	32.2889	437.46	5	30.1778	44.5778	437.46	4	47.4222	58.6222	227.93	2	97	99
Binza	7	0.49	1	97	99	133.14	1	97	99	133.14	1	97	99	69.37	1	97	99
Budja	4	0.28	1	97	99	76.08	1	97	99	76.08	1	97	99	39.64	1	97	99
Ngbandi	4	0.28	8	0	14.7333	76.08	5	8.62222	27.0222	76.08	5	25.8667	41.0667	39.64	3	92.6889	95.4889
Nzakara	2	0.14	8	0	14.7333	38.04	5	8.62222	27.0222	38.04	5	25.8667	41.0667	19.82	3	92.6889	95.4889
Kare	6	0.42	5	25.8667	41.0667	114.12	4	40.9556	53.3556	114.12	4	58.2	67.4	59.46	2	97	99
Malele/Makere	5	0.35	5	15.0889	32.2889	95.1	5	30.1778	44.5778	95.1	4	47.4222	58.6222	49.55	2	97	99
Aruwimi district	100	25		77.1	84.1313	969		81.6936	87.7216	969		87.4607	91.8247			96.6982	98.7542
Mbole	17	4.25	1	97	99	164.73	1	97	99	164.73	1	97	99		1	97	99
Topoke/Sdo	19	4.75	5	53.3	69.1	184.11	5	66.6	78.2	184.11	4	81.8	88.6		2	97	99
Bango/Budja	10	2.5	1	97	99	96.9	1	97	99	96.9	1	97	99		1	97	99
Mongo-Ngando	7	1.75	8	0	14.7333	67.83	5	8.62222	27.0222	67.83	5	25.8667	41.0667		3	92.6889	95.4889
Binza	15	3.75	1	97	99	145.35	1	97	99	145.35	1	97	99		1	97	99
Metoko	11	2.75	1	97	99	106.59	1	97	99	106.59	1	97	99		1	97	99
Mbesa	11	2.75	5	53.3	69.1	106.59	5	66.6	78.2	106.59	4	81.8	88.6		2	97	99
Lokele	4	1	1	97	99	38.76	1	97	99	38.76	1	97	99		1	97	99
Ombo	6	1.5	1	97	99	58.14	1	97	99	58.14	1	97	99		1	97	99
Ituri district	100			32.4898	47.7851	159		41.8018	55.8958	159		56.9612	67.7052	502		93.6589	95.8289
Mamvu/Lese	31		5	25.8667	41.0667	49.29	4	40.9556	53.3556	49.29	4	58.2	67.4	155.62	2	97	99
Ndaka/Mbo/Pere	22		5	40	60	34.98	5	40	60	34.98	5	53.3	69.1	110.44	3	97	99
Budu	3		3	68.9778	76.1778	4.77	3	84.0667	88.4667	4.77	2	97	99	15.06	2	97	99
Kumu	5		4	47.4222	58.6222	7.95	4	62.5111	70.9111	7.95	3	79.7556	84.9556	25.1	2	97	99
Nande	10		8	0	14.7333	15.9	5	8.62222	27.0222	15.9	5	25.8667	41.0667	50.2	3	92.6889	95.4889
Lika	5		3	68.9778	76.1778	7.95	3	84.0667	88.4667	7.95	2	97	99	25.1	2	97	99
Forest Bira	5		4	47.4222	58.6222	7.95	4	62.5111	70.9111	7.95	3	79.7556	84.9556	25.1	2	97	99
Plains Bira	7		5	25.8667	41.0667	11.13	4	40.9556	53.3556	11.13	4	58.2	67.4	35.14	2	97	99
Lendu	9		5	40	60	14.31	5	40	60	14.31	5	53.3	69.1	45.18	3	97	99
Alur	3		8	0	5	4.77	8	0	5	4.77	8	0	5	15.06	8	0	5
Maniema district	100	8		84.584	88.888	207		87.9036	91.5916	207		91.6973	94.6813	681		97	99
Tetela	17	1.36	1	97	99	35.19	1	97	99	35.19	1	97	99	115.77	1	97	99
Lega	26	2.08	1	97	99	53.82	1	97	99	53.82	1	97	99	177.06	1	97	99
Songola/Gengele	20	1.6	1	97	99	41.4	1	97	99	41.4	1	97	99	136.2	1	97	99
Hemba/Luba	4	0.32	1	97	99	8.28	1	97	99	8.28	1	97	99	27.24	1	97	99
Bembe	7	0.56	5	25.8667	41.0667	14.49	4	40.9556	53.3556	14.49	4	58.2	67.4	47.67	2	97	99
Kumu	15	1.2	4	47.4222	58.6222	31.05	4	62.5111	70.9111	31.05	3	79.7556	84.9556	102.15	2	97	99
Bangubangu/Songye	8	0.64	1	97	99	16.56	1	97	99	16.56	1	97	99	54.48	1	97	99
Ombo	3	0.24	1	97	99	6.21	1	97	99	6.21	1	97	99	20.43	1	97	99
Haut Luapula district	100	9		26.3356	36.5456	18		33.53	41.92	18		41.7522	48.0622	35		57.23	60.46
Lamba	29	2.61	8	0	5	5.22	8	0	5	5.22	8	0	5	10.15	8	0	5
Sanga	18	1.62	5	62.8	75.6	3.24	4	76.1	84.7	3.24	4	91.3	95.1	6.3	2	97	99
Bemba-Aushi	23	2.07	5	4.31111	23.5111	4.14	5	19.4	35.8	4.14	4	36.6444	49.8444	8.05	2	97	99
Lunda-Ndembu	10	0.9	5	62.8	75.6	1.8	4	76.1	84.7	1.8	4	91.3	95.1	3.5	2	97	99
Luba-Katanga	8	0.72	1	97	99	1.44	1	97	99	1.44	1	97	99	2.8	1	97	99
Kaonde	5	0.45	8	0	5	0.9	8	0	5	0.9	8	0	5	1.75	8	0	5
Lala	7	0.63	8	0	5	1.26	8	0	5	1.26	8	0	5	2.45	8	0	5
Lomami district	100			90.844	94.788	140		93.238	96.426	140		95.974	98.298	105		97	99
Songye	36		1	97	99	50.4	1	97	99	50.4	1	97	99	37.8	1	97	99
Luba-Katanga	29		1	97	99	40.6	1	97	99	40.6	1	97	99	30.45	1	97	99
Luba-Kasai/Kanyok	17		1	97	99	23.8	1	97	99	23.8	1	97	99	17.85	1	97	99
Lunda-Ndembu	18		5	62.8	75.6	25.2	4	76.1	84.7	25.2	4	91.3	95.1	18.9	2	97	99
Tanganiyka-Mueru district	100	3		44.4687	54.6707	34		51.1646	59.4486	34		58.817	64.909	65		70.81	73.62
Luba-Katanga/Hemba	17	0.51	1	97	99	5.78	1	97	99	5.78	1	97	99	11.05	1	97	99
Tongwe	9	0.27	8	0	5	3.06	8	0	5	3.06	8	0	5	5.85	8	0	5
Tabwa	8	0.24	8	0	5	2.72	8	0	5	2.72	8	0	5	5.2	8	0	5
Bwile	10	0.3	8	0	5	3.4	8	0	5	3.4	8	0	5	6.5	8	0	5
Bembe/Boyo	10	0.3	5	25.8667	41.0667	3.4	4	40.9556	53.3556	3.4	4	58.2	67.4	6.5	2	97	99
Kunda	13	0.39	5	43.8	62.6	4.42	5	57.1	71.7	4.42	4	72.3	82.1	8.45	2	97	99
Bemba-Lomotwa	12	0.36	5	43.8	62.6	4.08	5	57.1	71.7	4.08	4	72.3	82.1	7.8	2	97	99
Sanga	8	0.24	5	62.8	75.6	2.72	4	76.1	84.7	2.72	4	91.3	95.1	5.2	2	97	99
Bangubangu/Songye	7	0.21	1	97	99	2.38	1	97	99	2.38	1	97	99	4.55	1	97	99
Kalanga	6	0.18	5	43.8	62.6	2.04	5	57.1	71.7	2.04	4	72.3	82.1	3.9	2	97	99
Kivu district	100			38.6491	46.4871	41		43.5638	51.2798	41		50.2891	56.7571	482		69.1933	72.1533
Lega	33		1	97	99	13.53	1	97	99	13.53	1	97	99	159.06	1	97	99
Bembe	8		5	25.8667	41.0667	3.28	4	40.9556	53.3556	3.28	4	58.2	67.4	38.56	2	97	99
Shi-Havu	16		8	0	5	6.56	8	0	5	6.56	8	0	5	77.12	8	0	5
Hunde	9		8	0	5	3.69	8	0	5	3.69	8	0	5	43.38	8	0	5
Nande	15		8	0	14.7333	6.15	5	8.62222	27.0222	6.15	5	25.8667	41.0667	72.3	3	92.6889	95.4889
Nyanga	14		5	25.8667	41.0667	5.74	4	40.9556	53.3556	5.74	4	58.2	67.4	67.48	2	97	99
Kumu	2		4	47.4222	58.6222	0.82	4	62.5111	70.9111	0.82	3	79.7556	84.9556	9.64	2	97	99
Tongwe	3		8	0	5	1.23	8	0	5	1.23	8	0	5	14.46	8	0	5
Lulua district	100			90.844	94.788	2		93.238	96.426	2		95.974	98.298			97	99
Western Lunda	45		1	97	99	0.9	1	97	99	0.9	1	97	99		1	97	99
Luba-Katanga	16		1	97	99	0.32	1	97	99	0.32	1	97	99		1	97	99
Lunda-Ndembu	18		5	62.8	75.6	0.36	4	76.1	84.7	0.36	4	91.3	95.1		2	97	99
Lwena	6		1	97	99	0.12	1	97	99	0.12	1	97	99		1	97	99
Chokwe	15		1	97	99	0.3	1	97	99	0.3	1	97	99		1	97	99
Circumcision classes. CL1			CL2 (used in charts)				CL2 (used in charts)				CL2 (used in charts)				CL2 (used in charts)
1. GenPuberty		180.03	1	180.03		9416.6	1	9416.6		9416.6	1	9443.9		146953	1	161032
2. Adop_FFGen_>=GenTime		0	2	19.75		0	2	522.3		27.3	2	522.3		14078.8	2	5250.23
3. Adop_FFGen_>=2/3GenT<GenT		0.42	3	0.42		124.82	3	124.82		977.89	3	977.89		22586.4	3	22586.4
4. Adop_FFGen_>=1/3GenT<2/3GenT		8.06	4	8.06		2462.36	4	2462.36		3019.28	4	3019.28		0	4	0
5. Adop_FFGen_<1/3GenTime		76.29	5	76.29		4296.29	5	4296.29		2859	5	2859		177.48	5	177.48
6. LateAdol_>=GenTime		0	6	78.45		0	6	160.63		0	6	160.63		0	6	750.84
7. LateAdol_<GenTime		19.75	7	0		522.3	7	0		522.3	7	0		5250.23	7	0
8. Absent		78.45				160.63				160.63				750.84
9. Other situations		0				0				0				0
Total		363		363		16983		16983		16983		16983		189797		189797
Table DRC-2. The districts of the Belgian Congo, as described in the administrative map from 1921 (Institut Cartographique Militaire 1921). In the second column are the demographic weights of their ethnic groups, considered proportional to the ocuppied areas, as read in ethnic maps (Burssens 1958; Heeney 1959; Saint Moulin 2003). The weighted circumcision rate estimate of each district is calcula…
TABLE DRC-3
KINSHASA	1958
Ethnic group/ region of origin	# of people	Circ. CL1	% circumcised		Basis of circumcision estimate (see explanation in the Charts sheet)
			Lower	Upper	Ref.Time	Process	Initial situation	References
Cataractes	82362		97	99				Table DRC-2
Bas-Congo	20602		97	99				Table DRC-2
Lac Leopold II	12976		96.1809	98.3329				Table DRC-2
Kwilu	13915		97	99				Table DRC-2
Kwango	19009		97	99				Table DRC-2
Équateur	3944		94.3271	96.8231				Table DRC-2
Ubangi	4583		95.5342	97.8062				Table DRC-2
Tshuapa	5119		94.3271	96.8231				Table DRC-2
Mongala	9239		95.9222	98.1222				Table DRC-2
Stanleyville	2586		75.66	78.32				Table DRC-2
Ituri	502		93.6589	95.8289				Table DRC-2
Bas Uele	991		96.7413	98.7893				Table DRC-2
Haut Uele	612		80.47	87.69				Table DRC-2
Kivu	482		69.1933	72.1533				Table DRC-2
Maniema	681		97	99				Table DRC-2
Tanganika	65		70.81	73.62				Table DRC-2
Haut Lomami	105		97	99				Table DRC-2
Kasai	7749		97	99				Table DRC-2
Sankuru	4240		97	99				Table DRC-2
Luapula	35		57.23	60.46				Table DRC-2
Kabinda	893	1	97	99				Table DRC-1
Ruanda	59	8	0	5				Drain2006, Baumann1962, Friedrichs1924, Gray1999, Hewlett
Urundi	16	8	0	5				Drain2006, Baumann1962, Friedrichs1924, Gray1999, Hewlett
Lualaba	310	1	97	99				Table DRC-1
Luluabourg	1165	1	97	99				Table DRC-1
Angola	39837	1	97	99				Drain2006, FerreiraDiniz1918, Gray1999, Hewlett
Cabinda	468	1	97	99				Frazer1938, Bruel1935, MartinsVaz1970
AEF	7270	1	95	97				Drain2006, Delafosse1930, Bruel1935, Baumann1962
AOF	266	1	90	94				DHS, Drain2006, Delafosse1930, Frobenius1929, Baumann1962, Gray1999, Hewlett
Dakar	19	1	97	99				DHS, Drain2006, Frazer1938, Delafosse1912, Delafosse1930, Gray1999, Hewlett
Cameroun	40	9	88	92				DHS, Drain2006, Baumann1962, Forde1954, Gray1999, Hewlett
Senegal	269	1	97	99				DHS, Drain2006, Frazer1938, Delafosse1912, Delafosse1930, Gray1999, Hewlett
Gabon	49	1	97	99				Drain2006, Cureau1915, Raponda-Walker1962, Bruel1935
Togo	115	9	70	90				Drain2006, Baumann1962, Gray1999, Hewlett
Sierra Leone	16	1	97	99				Drain2006, Clarke1863, Migeod1925, Gray1999, Hewlett
Ghana	109	9	50	70				DHS, Drain2006, Gray1999, Hewlett
Nigeria	66	1	97	99				DHS, Drain2006, Gray1999, Hewlett
Tanzania	52	9	40	60				Drain2006, Bongaarts1989, Gray1999, Hewlett
Kenya	2	9	60	80				Drain2006, Bongaarts1989, Gray1999, Hewlett
Soudan	24	9	40	60				Drain2006, Bongaarts1989, Gray1999, Hewlett
Zanzibar	1	9	40	60				Drain2006, Bongaarts1989, Gray1999, Hewlett
Rhodesie	3	9	10	30				Drain2006, Bongaarts1989, Gray1999, Hewlett
Total	240846		231898	236930
Circumcision rate (weighted average)			96.2848	98.3741
Circumcision classes. CL1		CL2 (used in charts)
1. GenPuberty	197581	1	211660
2. Adop_FFGen_>=GenTime	14078.8	2	5250.23
3. Adop_FFGen_>=2/3GenT<GenT	22586.4	3	22586.4
4. Adop_FFGen_>=1/3GenT<2/3GenT	0	4	0
5. Adop_FFGen_<1/3GenTime	177.48	5	177.48
6. LateAdol_>=GenTime	0	6	825.84
7. LateAdol_<GenTime	5250.23	7	346
8. Absent	825.84
9. Other situations	346
Total	240846		240846
Table DRC-3. Circumcision rate estimates for Kinshasa in 1958. The distribution of inhabitants by regions of origin is presented in Spitaels (1959), p.6. For the districts, the circumcision rate estimates come from Table DRC-2. The bottom of the table shows the distribution of people by the defined circumcision classes CL1 and CL2 (the latter used in the charts of the Charts sheet). See additiona…
TABLE DRC-4
KINSHASA	1919				1927
Ethnic group/ region of origin	# of people	Circ. CL1	% circumcised		# of people	Circ. CL1	% circumcised		Basis of circumcision estimate (see explanation in the Charts sheet)
			Lower	Upper			Lower	Upper	Ref.Time	Process	Initial situation	References
Bas Congo	4163		93.8	97.6	4163		94.5467	97.9267				Table DRC-2
Kwango	871		92.44	95.88	871		94.72	97.44				Table DRC-2
Kasai	580		94.701	97.427	580		96.373	98.571				Table DRC-2
Sankuru	1226		95.328	97.856	1226		96.544	98.688				Table DRC-2
Équateur	1232		35.0338	49.7298	1232		48.2247	60.086				Table DRC-2
Lac Leopold II	726		75.1482	82.1042	726		79.6053	85.524				Table DRC-2
Lulonga	338		39.7008	54.8788	338		54.391	65.8837				Table DRC-2
Bangala	2332		66.9636	75.5716	2332		77.0507	83.0347				Table DRC-2
Ubangi	1219		63.3827	71.8387	1219		71.8413	78.5693				Table DRC-2
Stanleyville	581		57.036	63.152	581		64.6236	69.3316				Table DRC-2
Haut Uele	243		38.8247	53.7727	243		49.9473	62.8313				Table DRC-2
Bas Uele	1902		47.2282	58.4642	1902		62.5758	70.9638				Table DRC-2
Aruwimi	969		81.6936	87.7216	969		87.4607	91.8247				Table DRC-2
Ituri	159		41.8018	55.8958	159		56.9612	67.7052				Table DRC-2
Maniema	207		87.9036	91.5916	207		91.6973	94.6813				Table DRC-2
Haut Luapula	18		33.53	41.92	18		41.7522	48.0622				Table DRC-2
Lomami	140		93.238	96.426	140		95.974	98.298				Table DRC-2
Tanganika-Moero	34		51.1646	59.4486	34		58.817	64.909				Table DRC-2
Kivu	41		43.5638	51.2798	41		50.2891	56.7571				Table DRC-2
Lulua	2		93.238	96.426	2		95.974	98.298				Table DRC-2
Ruanda-Urundi	1	8	0	5	1	8	0	5				Baumann1962, Friedrichs1924, Gray1999, Hewlett
French Congo	2647	1	90	93	2647	1	92	95				Courboin1904, Delafosse1930, Bruel1935, Frazer1938, Baumann1962
Portuguese Congo (mostly Bazombo)	4610	5	65	85	4610	5	72.4667	88.2667				FerreiraDiniz1918, Frazer1938, Frobenius1929
Togo	39	9	40	60	39	9	40	60				Frobenius1929, Gray1999, Hewlett
AEF	121	1	90	93	121	1	92	95				Courboin1904, Delafosse1930, Bruel1935, Frazer1938, Baumann1962
San Salvador	86	5	65	85	86	5	72.4667	88.2667				FerreiraDiniz1918, Frazer1938, Frobenius1929
Senegal	139	1	92	95	139	1	97	99				Frazer1938, Delafosse1912, Delafosse1930, Zaborowski1896, Frobenius1929
Gold Coast	56	9	10	30	56	9	10	30				Frobenius1929, Gray1999, Hewlett
Sierra Leone	73	1	97	99	73	1	97	99				Clarke1863, Migeod1925, Gray1999, Hewlett
Ivory Coast	1	9	20	40	1	9	20	40				Zaborowski1896, Frobenius1929, Gray1999, Hewlett
Lagos	33	1	90	93	33	1	92	95				Frobenius1929, Gray1999, Hewlett
Uganda	1	9	20	40	1	9	20	40				Frobenius1929, Gray1999, Hewlett
Cape Vert	1	8	0	5	1	8	0	5				Drain2006
Liberia	3	9	40	60	3	9	40	60				Strong1930, Schwab1947, Gray1999, Hewlett
San Paul de Loanda	33	1	94	96	33	1	97	99				FerreiraDiniz1918, Gray1999, Hewlett
Jamaica	1	8	0	5	1	8	0	5				Drain2006
Martinique	1	8	0	5	1	8	0	5				Drain2006
Dahomey	18	9	40	60	18	9	40	60				Frobenius1929, Gray1999, Hewlett
Gabon	28	1	94	96	28	1	97	99				Cureau1915, Raponda-Walker1962, Bruel1935
Saint Thomas	3	8	0	5	3	8	0	5				SobralGonçalves1973
Cuba	2	8	0	5	2	8	0	5				Drain2006
Cabinda	28	1	97	99	28	1	97	99				FerreiraDiniz1918,Frazer1938, Bruel1935, MartinsVaz1970
Total	24908		18297.9	20560.2	24908		19833.3	21635.2
Circumcision rate (weighted average)			73.4618	82.5447			79.6262	86.8605
Circumcision classes. CL1		CL2 (used in charts)				CL2 (used in charts)
1. GenPuberty	12518.6	1	12518.6		12518.6	1	12545.9
2. Adop_FFGen_>=GenTime	0	2	522.3		27.3	2	522.3
3. Adop_FFGen_>=2/3GenT<GenT	124.82	3	124.82		977.89	3	977.89
4. Adop_FFGen_>=1/3GenT<2/3GenT	2462.36	4	2462.36		3019.28	4	3019.28
5. Adop_FFGen_<1/3GenTime	8992.29	5	8992.29		7555	5	7555
6. LateAdol_>=GenTime	0	6	169.63		0	6	169.63
7. LateAdol_<GenTime	522.3	7	118		522.3	7	118
8. Absent	169.63				169.63
9. Other situations	118				118
Total	24908		24908		24908		24908
Table DRC-4. Circumcision rate estimates for Kinshasa in 1919 and 1927. For the year 1927, the distribution of inhabitants by ethnic groups/regions of origin is presented in AIMO (1927). For the year 1919, we assume a distribution proportional to the 1927 one. For the districts, the circumcision rate estimates come from Table DRC-2. The bottom of the table shows the distribution of people by the …
TABLE DRC-5
KINSHASA	1912
Ethnic group/ region of origin	# of people	Circ. CL1	% circumcised		Basis of circumcision estimate (see explanation in the Charts sheet)
			Lower	Upper	Ref.Time	Process	Initial situation	References
Bangala	67		59.754	69.0413				Table DRC-2
Équateur	56		28.624	41.3827				Table DRC-2
Maniema	8		84.584	88.888				Table DRC-2
Mongala	18		59.754	69.0413				Table DRC-2
Ubangi	28		58.18	65.9493				Table DRC-2
Katanga	9		26.3356	36.5456				Table DRC-2
Haut Uele	7		28.866	45.662				Table DRC-2
Bas Uele	7		34.1871	47.5271				Table DRC-2
Kwango	23		90.445	94.515				Table DRC-2
Kwilu	10		90.445	94.515				Table DRC-2
Kasai	70		93.238	96.426				Table DRC-2
Lac Leopold II	25		73.51	79.7693				Table DRC-2
Aruwimi	25		77.1	84.1313				Table DRC-2
Orientale	5		50.3969	57.7449				Table DRC-2
Coquilhatville	1		28.624	41.3827				Table DRC-2
Lisala	6		59.754	69.0413				Table DRC-2
Tanganika	3		44.4687	54.6707				Table DRC-2
Stanley Falls	2		50.3969	57.7449				Table DRC-2
Stanleyville	2		50.3969	57.7449				Table DRC-2
Lukolela (Bobangi, Mpama)	4	1	86	92				Table DRC-1
Batetela	33	1	97	99				Table DRC-1
Basonge-Kasai (Songye)	2	1	97	99				Table DRC-1
Bolobo (Bobangi, Tiene)	9	1	97	99				Table DRC-1
Baluba	30	1	97	99				Table DRC-1
Dolo (near Budjala -Ngombe, Mbanza, Ngbandi)	1	5	53.2667	63.1111				Table DRC-1
Mongo-Ngando	4	8	0	14.7333				Table DRC-1
Mongo-Nkundu	4	7	75	85				Table DRC-1
Budja	2	1	97	99				Table DRC-1
Bacongo	34	1	97	99				Table DRC-1
Moyen Congo (Teke, Ngenge, Mpama)	22	1	89.6667	94.3333				Table DRC-1
Yumbi (near Bolobo, Tiene)	2	1	97	99				Table DRC-1
Bokala	5	8	0	14.7333				Table DRC-1
Wangata (Mongo-Nkundu)	34	7	75	85				Table DRC-1
Basankusu (Ngombe)	1	5	62.8	75.6				Table DRC-1
Nouvelle Anvers (Ngombe, Mbanza)	1	5	79.9	87.3				Table DRC-1
Akula (near N-Anvers -Ngombe, Mbanza)	2	1	79.9	87.3				Table DRC-1
Rubi (near Buta -Babwa)	1	5	15.0889	32.2889				Table DRC-1
Buta (Babwa)	3	5	15.0889	32.2889				Table DRC-1
Ruzizi (Burundi)	1	8	0	5				Baumann1962, Friedrichs1924, Gray1999, Hewlett
Bali	1	8	0	5				Table DRC-1
Basoko (So, Topoke, Mbesa)	30	5	53.3	69.1				Table DRC-1
Kisantu (Kongo)	3	1	97	99				Table DRC-1
Busira (near Boende -Mongo)	1	7	75	85				Table DRC-1
Ponthierville (Songola)	2	1	97	99				Table DRC-1
Libenge (Ngbaka)	3	1	97	99				Table DRC-1
Libenge (Ngombe)	3	5	62.8	75.6				Table DRC-1
Libanza (=Mbanza)	1	1	97	99				Table DRC-1
Matadi (San Salvador)	1	5	65	85				Table DRC-1
Ikengo (N of Boende -Ngando)	1	8	0	14.7333				Table DRC-1
Upoto (=Poto)	1	1	97	99				Table DRC-1
Baleka (=Lega)	2	1	97	99				Table DRC-1
Kindu (Lega, Songola)	1	1	97	99				Table DRC-1
Bamfunga (Bamwe/Ngiri)	5	1	97	99				Table DRC-1
Babutu (Kumu)	2	4	47.4222	58.6222				Table DRC-1
Moenge (Bango/Budja)	2	1	97	99				Table DRC-1
Bumba (Budja)	4	1	97	99				Table DRC-1
Bobangi	1	1	97	99				Table DRC-1
Madimba (Kongo)	3	1	97	99				Table DRC-1
Haute Sele (Kongo, San Salvador)	1	5	81	92				Table DRC-1
Yakoma	1	8	0	14.7333				Table DRC-1
Sango	2	8	0	14.7333				Table DRC-1
Fayala (Yanz)	1	1	97	99				Table DRC-1
Wambole (=Mbole)	1	1	97	99				Table DRC-1
Banana (Kongo)	1	1	97	99				Table DRC-1
French Congo	2	1	90	94				Courboin1904, Delafosse1930, Bruel1935, Frazer1938, Baumann1962
Sierra Leone	6	1	97	99				Clarke1863, Migeod1925, Gray1999, Hewlett
Senegal	2	9	87	94				Zaborowski1896, Frazer1938, Delafosse1912, Delafosse1930, Frobenius1929
Loango (Vili)	3	1	97	99				Zaborowski1896, Frazer1938, Bruel1935, Frobenius1929, Hewlett
Cabinda (Yombe, Vili)	2	1	97	99				Frazer1938, Bruel1935, MartinsVaz1970
Total	656		468.949	515.362
Circumcision rate (weighted average)			71.4861	78.5613
Circumcision classes. CL1		CL2 (used in charts)
1. GenPuberty	364.03	1	364.03
2. Adop_FFGen_>=GenTime	0	2	58.75
3. Adop_FFGen_>=2/3GenT<GenT	0.42	3	0.42
4. Adop_FFGen_>=1/3GenT<2/3GenT	10.06	4	10.06
5. Adop_FFGen_<1/3GenTime	118.29	5	118.29
6. LateAdol_>=GenTime	0	6	93.45
7. LateAdol_<GenTime	58.75	7	2
8. Absent	93.45
9. Other situations	2
Total	647		647
Table DRC-5. Circumcision rate estimates for Kinshasa in 1912. We assume the distribution of inhabitants by regions of origin is proportional to the one shown in two surveys of hospital entries in 1911 and 1912, involving 656 patients either from the city (which at that time had about 5,000 people), or from connected colonial centers (Douchet & Dubois 1911, 1912). For the districts, the circumcis…

## Sheet: CBrazza
CONGO-BRAZZAVILLE / FRENCH CONGO
Tables of ethnic composition of cities and estimates of circumcision classes and circumcision rates
		VARIABLES
		45		GenTimeAdopt
		30		GenTimeFFG
		Lower	Upper
		0	5	Absent
		97	99	CurrGeneral
		97	99	GenPuberty
		75	85	LateAdoles
		0	20	StartAdoption
		40	60	FarFromGen
		65	85	MajPuberty
TABLE CBrazza-1
BRAZZAVILLE	1950
Ethnic group/ region of origin	% of popul.	Circ. Class	% circumcised		Basis of circumcision estimate (see explanation in the Charts sheet)
			Lower	Upper	Ref.Time	Process	Initial situation	References
Bakongo + Balali + Basundi	19.587	1	97	99			GenPuberty	Torday1928, Jensen1933, VanWing1938, Frazer1938, Bruel1935, Laman1957, Gray1999, Hewlett
Bateke	8.663	1	97	99			GenPuberty	Guiral1886, Courboin1904, Baumann1962, Bruel1935, Gray1999, Hewlett
Mbochi	3.578	1	97	99			GenPuberty	Courboin1904, Delafosse1930, Bruel1935
Others from Haut Congo	10.735	1	97	99			GenPuberty	Loyre1909, Koch1913, Bruel1910, Bruel1935, Perrois1967, Frobenius1929, Baumann1962, Ballif1992
Mbondjo	2.637	1	97	99			GenPuberty	Darré1923, Bruel1935, Hewlett
Others from Bas Oubangui	5.273	1	97	99			GenPuberty	Jensen1933, Bruel1935, Baumann1962
Remaining AEF	14.69	1	90	96				Raponda-Walker1962, Bruel1935, Baumann1962, Frobenius1929, Gray1999, Hewlett
Senegal + Togo + Dahomey	4.52	1	90	94				Baumann1962, Frobenius1929, Gray1999, Hewlett
Other foreigners (Belgian Bas Congo, Cameroon, Angola-Cabinda)	5.65	1	97	99				Weeks1914, FerreiraDiniz1918, Frazer1938, Alexandre1958, Bruel1935, Gray1999, Hewlett, MartinsVaz1970, Berlin1996
Bacongo quarter (Bakongo + Balali + Basundi)	24.667	1	97	99			GenPuberty	Torday1928, Jensen1933, VanWing1938, Frazer1938, Bruel1935, Laman1957, Gray1999, Hewlett
Total	100		95.6553	98.3333
Circumcision rate (weighted average)			95.6553	98.3333
Circumcision classes. CL1		CL2 (used in charts)
1. GenPuberty	100	1	100
2. Adop_FFGen_>=GenTime	0	2	0
3. Adop_FFGen_>=2/3GenT<GenT	0	3	0
4. Adop_FFGen_>=1/3GenT<2/3GenT	0	4	0
5. Adop_FFGen_<1/3GenTime	0	5	0
6. LateAdol_>=GenTime	0	6	0
7. LateAdol_<GenTime	0	7	0
8. Absent	0
9. Other situations	0
Total	100		100
Table CBrazza-1. Circumcision rate estimates for Brazzaville in 1950. The distribution of inhabitants by ethnic/regional origins is presented in Balandier (1955), p.37. The bottom of the table shows the distribution of people by the defined circumcision classes CL1 and CL2 (the latter used in the charts of the Charts sheet). See additional explanations in the Charts sheet.
TABLE CBrazza-2
BRAZZAVILLE	1919				1932
Ethnic group/ region of origin	% of popul.	Circ. CL1	% circumcised		# of people	Circ. CL1	% circumcised		Basis of circumcision estimate (see explanation in the Charts sheet)
			Lower	Upper			Lower	Upper	Ref.Time	Process	Initial situation	References
Bornou (=Kanouri, Chad)	0.295263	1	97	99	47	1	97	99			GenPuberty	Gray1999, Hewlett
Yakoma	1.9412	5	8.62222	27.0222	309	4	36.6444	49.8444	1915	Adoption	Absent	Jensen1933, Tanghe1948, Baumann1962, Gray1999, Hewlett
Bonga (Mossaka)	2.19877	1	97	99	350	1	97	99			GenPuberty	Bruel1935, Courboin1904
Banda	1.50144	4	76.1	84.7	239	3	97	99	1900	Generalization	FarFromGen	Landor1907, Jensen1933, Bruel1935, Baumann1962, Frobenius1929, Delafosse1930
Mbeté (Kelle and Ewo N districts)	2.32441	1	97	99	370	1	97	99			GenPuberty	Frobenius1929
M'Boko (Mbochi, Makoua West)	0.194748	1	97	99	31	1	97	99			GenPuberty	Courboin1904, Delafosse1930, Bruel1935, Ballif1992
Baya	1.27529	3	73.2889	79.6889	203	2	97	99	1885	Adoption	Absent	Clozel1896, Millous1936, Fontaine1928, Delafosse1930, Bruel1935, Bryk 1934, Gray1999, Hewlett
Sara	0.684759	5	8.62222	27.0222	109	4	36.6444	49.8444	1915	Adoption	Absent	Kerandel1909, Jensen1933, Lebeuf1954, Baumann1962, Gray1999, Hewlett
Bateke	1.7653	1	92	94	281	1	92	94			GenPuberty	Guiral1886, Courboin1904, Jensen1933, Baumann1962, Bruel1935, Frobenius1929, Gray1999, Hewlett
Makoua	0.929765	1	97	99	148	1	97	99			GenPuberty	Courboin1904, Delafosse1930, Bruel1935, Ballif1992
Loango	0.961176	5	65	85	153	5	77.8	90.6	1920	Generalization	MajPuberty	Zaborowski1896, Jensen1933, Frazer1938, Bruel1935, Hewlett
Bandjia/Mbandjia	0.986305	4	76.1	84.7	157	3	97	99	1900	Generalization	FarFromGen	Gaud1911, Bruel1935, Frobenius1929
Mbochi	5.11371	1	97	99	814	1	97	99			GenPuberty	Courboin1904, Delafosse1930, Bruel1935, Ballif1992
Bondjo (Motaba-Ibenga)	3.83842	1	97	99	611	1	97	99			GenPuberty	Darré1923, Bruel1935, Hewlett
M'Bagga (part of Banda)	2.23018	3	73.2889	79.6889	355	2	97	99	1885	Adoption	Absent	Landor1907, Jensen1933, Bruel1935, Baumann1962, Frobenius1929, Delafosse1930
Balali (Bas-Congo)	5.22679	1	97	99	832	1	97	99			GenPuberty	Torday1928, Jensen1933, VanWing1938, Frazer1938, Bruel1935, Laman1957, Gray1999, Hewlett
Bacongo	3.22905	1	97	99	514	1	97	99			GenPuberty	Torday1928, Jensen1933, VanWing1938, Frazer1938, Bruel1935, Laman1957, Gray1999, Hewlett
Senegal	1.06797	1	90	94	170	1	97	99				Frazer1938, Delafosse1912, Delafosse1930, Zaborowski1896, Frobenius1929
Popo (Togo)	0.295263	1	97	99	47	1	97	99			GenPuberty	Frobenius1929, Gray1999
Haoussa	0.471165	1	97	99	75	1	97	99			GenPuberty	Henric1902, Hewlett
Sierra Leone	0.446036	1	97	99	71	1	97	99			GenPuberty	Clarke1863, Migeod1925, Gray1999, Hewlett
Kasai	0.741299	1	97	99	118	1	97	99			GenPuberty	Janssens1912, Frobenius1929, Baumann1962
Kouya-Kouya (Plateau province)	2.43749	1	97	99	388	1	97	99			GenPuberty	Guiral1886, Baumann1962, Bruel1935, Gray1999, Hewlett
Bangala	2.72019	4	76.1	84.7	433	3	97	99	1900	Generalization	FarFromGen	VanOverbergh1907, Halkim1911, Jensen1933, Burssens1958, Gray1999
Kouyou	1.73389	1	97	99	276	1	97	99			GenPuberty	Courboin1904, Delafosse1930, Bruel1935, Ballif1992
Accra (Gold Coast)	0.0565398	9	10	30	9	9	10	30				Jensen1933, Frobenius1929, Gray1999, Hewlett
Bassoundi (Bas-Congo)	4.9755	1	97	99	792	1	97	99			GenPuberty	Torday1928, Jensen1933, VanWing1938, Frazer1938, Bruel1935, Laman1957, Gray1999, Hewlett
M'Baiki (=Bwaka)	0.364367	5	47.6	65.2	58	4	72.3	82.1	1915	Generalization	FarFromGen	Frobenius1929, Bruel1929
Gabon	0.238723	1	94	96	38	1	97	99			GenPuberty	Cureau1915, Raponda-Walker1962, Bruel1935
Yaunde	0.213595	7	75	85	34	7	83.8	90.6	1920	Advance to childhood	LateAdoles	Zenker1895, Jensen1933, Laburthe-Tolra1985, Laburthe-Tolra1999, Alexandre1958
Bacougni (Bas-Congo)	0.326674	1	97	99	52	1	97	99			GenPuberty	Torday1928, Jensen1933, VanWing1938, Frazer1938, Bruel1935, Laman1957, Gray1999, Hewlett
Impfondo	0.785275	1	97	99	125	1	97	99			GenPuberty	Darré1923, Bruel1935
Angola	0.263852	5	81	92	42	5	87.4	94.8	1920	Generalization	MajPuberty	Weeks1914, FerreiraDiniz1918, Jensen1933, Frazer1938, Frobenius1929, MartinsVaz1970, Berlin1996
Langoua (=Langwasi)	1.58311	3	73.2889	79.6889	252	2	97	99	1885	Adoption	Absent	Delafosse1930, Bruel1935
Bacongo quarter (Bakongo,Balali,Basundi)	46.5825	1	97	99	7415	1	97	99			GenPuberty	Torday1928, Jensen1933, VanWing1938, Frazer1938, Bruel1935, Laman1957, Gray1999, Hewlett
Total	100		91.5881	94.8886	15918		15114.1	15505.8
Circumcision rate (weighted average)			91.5881	94.8886			94.9496	97.4106
Circumcision classes. CL1		CL2 (used in charts)				CL2 (used in charts)
1. GenPuberty	85.218	1	85.218		13565	1	14375
2. Adop_FFGen_>=GenTime	0	2	0.213595		810	2	34
3. Adop_FFGen_>=2/3GenT<GenT	5.08858	3	5.08858		829	3	829
4. Adop_FFGen_>=1/3GenT<2/3GenT	5.20794	4	5.20794		476	4	476
5. Adop_FFGen_<1/3GenTime	4.21535	5	4.21535		195	5	195
6. LateAdol_>=GenTime	0	6	0		0	6	0
7. LateAdol_<GenTime	0.213595	7	0.0565398		34	7	9
8. Absent	0				0
9. Other situations	0.0565398				9
Total	100		100		15918		15918
Table CBrazza-2. Circumcision rate estimates for Brazzaville in 1919 and 1932. For the year 1932, the distribution of inhabitants by ethnic/regional origins is presented in Subdivision Autonome de Brazzaville (1932). For the year 1919, we assume a distribution proportional to the 1932 one. The bottom of the table shows the distribution of people by the defined circumcision classes CL1 and CL2 (th…

## Sheet: CAR
CENTRAL AFRICAN REPUBLIC / OUBANGUI-CHARI
Tables of ethnic composition of cities and estimates of circumcision classes and circumcision rates
		VARIABLES
		45		GenTimeAdopt
		30		GenTimeFFG
		Lower	Upper
		0	5	Absent
		97	99	CurrGeneral
		97	99	GenPuberty
		75	85	LateAdoles
		0	20	StartAdoption
		40	60	FarFromGen
		65	85	MajPuberty
TABLE CAR-1
BANGUI	1960
Ethnic group/ region of origin	% of popul.	Circ. CL1	% circumcised		Basis of circumcision estimate (see explanation in the Charts sheet)
			Lower	Upper	Ref.Time	Process	Initial situation	References
Mandjia	16	2	97	99	1900	Generalization	FarFromGen	Gaud1911, Bruel1935, Frobenius1929, Gray1999, Hewlett
Baya	13	2	97	99	1885	Adoption	Absent	Clozel1896, Millous1936, Fontaine1928, Delafosse1930, Bruel1935, Bryk 1934, Gray1999, Hewlett
Mbaka-Mandjia	6	2	97	99	1900	Generalization	FarFromGen	Gaud1911, Bruel1935, Frobenius1929
Ali (part of Mandjia)	3	2	97	99	1900	Generalization	FarFromGen	Gaud1911, Bruel1935, Frobenius1929
Banou	2.5	2	97	99	1900	Generalization	FarFromGen	Frobenius1929
Banda	33	2	97	99	1900	Generalization	FarFromGen	Landor1907, Jensen1933, Bruel1935, Baumann1962, Frobenius1929, Delafosse1930
Mbaka	8	2	97	99	1900	Generalization	FarFromGen	Gaud1911, Bruel1935, Frobenius1929
Yakoma	3	2	97	99	1915	Adoption	Absent	Delafosse1930, Jensen1933, Burssens1958, Frobenius1929, Tanghe1948, Baumann1962, Murdock1967, Gray1999, Hewlett
Banziri	1	2	97	99	1915	Adoption	Absent	Landor1907, Frobenius1929, Jensen1933, Baumann1962, Hewlett
Other Oubanguians (Zande, Nzakara)	2	2	97	99	1910	Adoption	Absent	Bruel1935, Callone-Beaufaict1921, Friedrichs1924, Jensen1933, Baumann1962, Frobenius1929, Gray1999, Hewlett
Sangha	1.5	1	97	99			GenPuberty	Bruel1910, Koch1913, Bruel1935, Frobenius1929
Chad (Mbum, Sara, Nilotic)	7	9	70	90				Kerandel1909, Jensen1933, Gray1999, Hewlett, Frobenius1929
Others (Haoussa, Cameroon)	4	1	90	94				DHS, Drain2006, Henric1902, Baumann1962, Forde1954, Gray1999, Hewlett
Total	100		94.83	98.17
Circumcision rate (weighted average)			94.83	98.17
Circumcision classes. CL1		CL2 (used in charts)
1. GenPuberty	5.5	1	93
2. Adop_FFGen_>=GenTime	87.5	2	0
3. Adop_FFGen_>=2/3GenT<GenT	0	3	0
4. Adop_FFGen_>=1/3GenT<2/3GenT	0	4	0
5. Adop_FFGen_<1/3GenTime	0	5	0
6. LateAdol_>=GenTime	0	6	0
7. LateAdol_<GenTime	0	7	7
8. Absent	0
9. Other situations	7
Total	100		100
Table CAR-1. Circumcision rate estimates for Bangui in 1960. The distribution of inhabitants by ethnic/regional origins is presented in Soret (1961), p.68. The bottom of the table shows the distribution of people by the defined circumcision classes CL1 and CL2 (the latter used in the charts of the Charts sheet). See additional explanations in the Charts sheet.
TABLE CAR-2
BANGUI	1931				1949
City quarter and ethnic group/ region of origin	% of popul.	Circ. CL1	% circumcised		# of people	Circ. CL1	% circumcised		Basis of circumcision estimate (see explanation in the Charts sheet)
			Lower	Upper			Lower	Upper	Ref.Time	Process	Initial situation	References
I - Mandjia	9.50273	3	97	99	3585	2	97	99	1900	Generalization	FarFromGen	Gaud1911, Bruel1935, Frobenius1929, Gray1999, Hewlett
II - Baya	6.45709	2	97	99	2436	2	97	99	1885	Adoption	Absent	Clozel1896, Millous1936, Fontaine1928, Delafosse1930, Bruel1935, Bryk 1934, Gray1999, Hewlett
III - Mbaka-Mandjia	12.8426	3	97	99	4845	2	97	99	1900	Generalization	FarFromGen	Gaud1911, Bruel1935, Frobenius1929
IV - Banda	22.4911	3	97	99	8485	2	97	99	1900	Generalization	FarFromGen	Landor1907, Jensen1933, Bruel1935, Baumann1962, Frobenius1929, Delafosse1930
V - Mbaka	10.7088	3	97	99	4040	2	97	99	1900	Generalization	FarFromGen	Gaud1911, Bruel1935, Frobenius1929
VI - Ali (part of Mandjia)	6.52865	3	97	99	2463	2	97	99	1900	Generalization	FarFromGen	Gaud1911, Bruel1935, Frobenius1929
VII - Banziri + Lambassi	7.68701	3	66.8222	74.4222	2900	2	97	99	1900	Adoption	Absent	Landor1907, Delafosse1930, Jensen1933, Bruel1935, Baumann1962, Frobenius1929, Hewlett
VIII - Cameroon	3.817	9	85	90	1440	9	87	91				DHS, Drain2006, Koch1913, Baumann1962, Forde1954, Gray1999, Hewlett
IX - Kanouri	0.477125	1	97	99	180	1	97	99			GenPuberty	Gray1999, Hewlett
IX - Nzakara	0.583152	4	34.4889	48.0889	220	3	73.2889	79.6889	1915	Adoption	Absent	Callone-Beaufaict1921, Jensen1933, Frobenius1929
IX - Zande	0.95955	3	71.1333	77.9333	362	2	97	99	1898	Adoption	Absent	Bruel1935, Callone-Beaufaict1921, Friedrichs1924, Jensen1933, Baumann1962, Frobenius1929, Gray1999, Hewlett
X - AOF	0.80581	9	85	90	304	9	87	92				DHS, Drain2006, Delafosse1930, Frobenius1929, Baumann1962, Gray1999, Hewlett
XI - Yakoma	4.22785	4	34.4889	48.0889	1595	3	73.2889	79.6889	1915	Adoption	Absent	Delafosse1930, Burssens1958, Frobenius1929, Jensen1933, Tanghe1948, Baumann1962, Murdock1967, Gray1999, Hewlett
XII - Haoussa	5.24572	1	97	99	1979	1	97	99			GenPuberty	Henric1902, Hewlett
XIV - Yakoma	3.18083	4	34.4889	48.0889	1200	3	73.2889	79.6889	1915	Adoption	Absent	Delafosse1930, Burssens1958, Frobenius1929, Jensen1933, Tanghe1948, Baumann1962, Murdock1967, Gray1999, Hewlett
XV - Sara	2.40948	4	34.4889	48.0889	909	3	73.2889	79.6889	1915	Adoption	Absent	Lebeuf1954, Kerandel1909, Jensen1933, Baumann1962, Gray1999, Hewlett
XVI - Sango	1.09474	4	34.4889	48.0889	413	3	73.2889	79.6889	1915	Adoption	Absent	Delafosse1930, Burssens1958, Frobenius1929, Jensen1933, Tanghe1948, Baumann1962, Murdock1967, Gray1999, Hewlett
XVII - Ndré (part of Banda)	0.980756	3	97	99	370	2	97	99	1900	Generalization	FarFromGen	Landor1907, Bruel1935, Baumann1962, Frobenius1929, Delafosse1930
Total	100		86.691	90.6397	37726		35391.5	36374.7
Circumcision rate (weighted average)			86.691	90.6397			93.8119	96.4182
Circumcision classes. CL1		CL2 (used in charts)				CL2 (used in charts)
1. GenPuberty	5.72284	1	12.1799		2159	1	31645
2. Adop_FFGen_>=GenTime	6.45709	2	0		29486	2	0
3. Adop_FFGen_>=2/3GenT<GenT	71.7012	3	71.7012		4337	3	4337
4. Adop_FFGen_>=1/3GenT<2/3GenT	11.4961	4	11.4961		0	4	0
5. Adop_FFGen_<1/3GenTime	0	5	0		0	5	0
6. LateAdol_>=GenTime	0	6	0		0	6	0
7. LateAdol_<GenTime	0	7	4.62281		0	7	1744
8. Absent	0				0
9. Other situations	4.62281				1744
Total	100		100		37726		37726
Table CAR-2. Circumcision rate estimates for Bangui in 1931 and 1949. For the year 1949, the distribution of inhabitants by ethnic/regional origins is presented in Lebeuf (1954), p.25. For the year 1931, we assume a distribution proportional to the 1949 one. The bottom of the table shows the distribution of people by the defined circumcision classes CL1 and CL2 (the latter used in the charts of t…

## Sheet: Gabon
GABON
Tables of ethnic composition of cities and estimates of circumcision classes and circumcision rates
		VARIABLES
		45		GenTimeAdopt
		30		GenTimeFFG
		Lower	Upper
		0	5	Absent
		97	99	CurrGeneral
		97	99	GenPuberty
		75	85	LateAdoles
		0	20	StartAdoption
		40	60	FarFromGen
		65	85	MajPuberty
TABLE Gabon-1
LIBREVILLE	1934				1953
Ethnic group/ region of origin	% of popul.	Circ. CL1	% circumcised		# of people	Circ. CL1	% circumcised		Basis of circumcision estimate (see explanation in the Charts sheet)
			Lower	Upper			Lower	Upper	Ref.Time	Process	Initial situation	References
Fang	40.6687	1	97	99	5437	1	97	99			GenPuberty	Jensen1933, Bryk1934, Trezenem1936, Alexandre1958, Bruel1935, Gray1999, Hewlett
Mpongwe	4.33091	5	79.9333	91.5333	579	3	97	99	1920	Generalization	MajPuberty	Zaborowski1896, Cureau1915, Jensen1933, Frazer1938, Raponda-Walker1962, Gray1999, Hewlett
Bandzabi (Njebi group)	5.90171	1	97	99	789	1	97	99			GenPuberty	Raponda-Walker1962, Hewlett
Bapounou	4.65255	1	97	99	622	1	97	99			GenPuberty	Raponda-Walker1962
Vili	4.33091	5	66.6	78.2	579	3	97	99	1920	Generalization	FarFromGen	Zaborowski1896, Bruel1935, Frazer1938, Hewlett
Mbété	3.82976	1	97	99	512	1	97	99			GenPuberty	Frobenius1929
Sékiani	3.64276	1	97	99	487	1	97	99			GenPuberty	Avelot1913, Frobenius1929
Masango/Sangu	2.97704	1	97	99	398	1	97	99			GenPuberty	Raponda-Walker1962
AOF	2.89476	9	87	91	387	9	89	93				DHS, Drain2006, Delafosse1930, Frobenius1929, Baumann1962, Gray1999, Hewlett
Cameroon	2.75264	1	93	96	368	1	97	99				DHS, Drain2006, Koch1913, Alexandre1958, Baumann1962, Forde1954, Gray1999, Hewlett
Bambamba (Mbere group)	2.3188	1	97	99	310	1	97	99			GenPuberty	Raponda-Walker1962
Bakota	2.25896	1	97	99	302	1	97	99			GenPuberty	Perrois1967, Gray1999, Hewlett
Baloumbou	1.82512	1	97	99	244	1	97	99			GenPuberty	Raponda-Walker1962, Hewlett
Togo + Dahomey	1.50348	9	40	60	201	9	70	90				Frobenius1929, Gray1999, Hewlett
Bapindji (Tshogo group)	1.27908	1	97	99	171	1	97	99			GenPuberty	Raponda-Walker1962, Gray1999, Hewlett
Nkomi (Omyéné group)	1.25664	1	97	99	168	1	97	99			GenPuberty	Raponda-Walker1962
Oroungou (Omyéné group)	1.24168	1	97	99	166	1	97	99			GenPuberty	Raponda-Walker1962
Benga	1.21176	1	97	99	162	1	97	99			GenPuberty	Nassau1904, Frobenius1929
Eshira	1.20428	1	97	99	161	1	97	99			GenPuberty	Raponda-Walker1962
Mbanhouin (Bakalai group)	0.979879	7	85.2667	91.5333	131	7	97	99	1920	Advance to childhood	LateAdoles	Avelot1913, Perrois1967, Raponda-Walker1962, Hewlett
Bawoumbou (Bakalai group)	0.964919	7	85.2667	91.5333	129	7	97	99	1920	Advance to childhood	LateAdoles	Avelot1913, Perrois1967, Raponda-Walker1962, Hewlett
Haoussa	0.934999	1	97	99	125	1	97	99			GenPuberty	Henric1902, Hewlett
Nigeria + Ghana	0.837759	9	65	85	112	9	65	85				Frobenius1929, Gray1999, Hewlett
Mitsogo	0.770439	1	97	99	103	1	97	99			GenPuberty	Raponda-Walker1962, Gray1999, Hewlett
Bakélé (Bakalai group)	0.755479	7	85.2667	91.5333	101	7	97	99	1920	Advance to childhood	LateAdoles	Avelot1913, Perrois1967, Raponda-Walker1962, Hewlett
Galoa	0.718079	1	97	99	96	1	97	99			GenPuberty	Raponda-Walker1962
Badouma (Njebi group)	0.635799	1	97	99	85	1	97	99			GenPuberty	Raponda-Walker1962, Hewlett
Batéké	0.613359	1	97	99	82	1	97	99			GenPuberty	Guiral1886, Courboin1904, Baumann1962, Bruel1935, Frobenius1929, Gray1999, Hewlett
Bakouélé	0.590919	7	85.2667	91.5333	79	7	97	99	1920	Advance to childhood	LateAdoles	Loyre1909, Koch1913, Baumann1962,Ballif1992
Adjoumba	0.493679	1	97	99	66	1	97	99			GenPuberty	Raponda-Walker1962
Various Congolese	0.34408	1	97	99	46	1	97	99			GenPuberty	Courboin1904, Delafosse1930, Bruel1935, Frazer1938, Baumann1962
Balali	0.28424	1	97	99	38	1	97	99			GenPuberty	Torday1928, VanWing1938, Frazer1938, Bruel1935, Laman1957, Gray1999, Hewlett
Portuguese colonies	0.19448	9	48.5	52	26	9	48.5	52				Weeks1914, FerreiraDiniz1918, Frazer1938, Frobenius1929, MartinsVaz1970, Berlin1996, Drain2006
Sara	0.13464	4	40.9556	53.3556	18	3	81.9111	86.7111	1915	Adoption	Absent	Kerandel1909, Lebeuf1954, Baumann1962, Gray1999, Hewlett
Zande	0.0972399	3	77.6	83.2	13	2	97	99	1898	Adoption	Absent	Jensen1933, Bruel1935, Friedrichs1924, Baumann1962, Frobenius1929, Gray1999, Hewlett
Yakoma	0.0747999	4	40.9556	53.3556	10	3	81.9111	86.7111	1915	Adoption	Absent	Delafosse1930, Jensen1933, Burssens1958, Frobenius1929, Tanghe1948, Baumann1962, Murdock1967, Gray1999, Hewlett
Mayoumba	0.0673199	5	66.6	78.2	9	3	97	99	1920	Generalization	FarFromGen	Zaborowski1896, Bruel1935, Frazer1938, Hewlett
Bandassa (Bakalai group)	0.0673199	7	85.2667	91.5333	9	7	97	99	1920	Advance to childhood	LateAdoles	Avelot1913, Perrois1967, Raponda-Walker1962, Hewlett
Bakaningui (Mbama group)	0.0673199	1	97	99	9	1	97	99			GenPuberty	Raponda-Walker1962
Mbochi	0.0598399	1	97	99	8	1	97	99			GenPuberty	Courboin1904, Delafosse1930, Bruel1935
Ennenga	0.0374	1	97	99	5	1	97	99			GenPuberty	Raponda-Walker1962
Bakamba (Kongo group)	0.02992	1	97	99	4	1	97	99			GenPuberty	Frazer1938, Bruel1935, Gray1999, Hewlett
Banziri	0.02992	4	40.9556	53.3556	4	3	81.9111	86.7111	1915	Adoption	Absent	Landor1907, Jensen1933, Bruel1935, Baumann1962, Frobenius1929, Hewlett
Mindoumou (Mbama group)	0.02992	1	97	99	4	1	97	99			GenPuberty	Raponda-Walker1962
Bavarama	0.02992	1	97	99	4	1	97	99			GenPuberty	Raponda-Walker1962, Hewlett
Spanish Guinea	0.02992	1	97	99	4	1	97	99			GenPuberty	Nassau1904, Avelot1913, Frobenius1929, Frazer1938
Shake (Bakalai group)	0.02244	7	85.2667	91.5333	3	7	97	99	1920	Advance to childhood	LateAdoles	Avelot1913, Perrois1967, Raponda-Walker1962, Hewlett, Baumann1962
Okande	0.02244	1	97	99	3	1	97	99			GenPuberty	Raponda-Walker1962, Gray1999, Hewlett
Total	100		92.7551	96.2755	13369		12829.4	13162.2
Circumcision rate (weighted average)			92.7551	96.2755			95.964	98.4529
Circumcision classes. CL1		CL2 (used in charts)				CL2 (used in charts)
1. GenPuberty	82.1228	1	82.1228		10979	1	10992
2. Adop_FFGen_>=GenTime	0	2	3.38096		13	2	452
3. Adop_FFGen_>=2/3GenT<GenT	0.0972399	3	0.0972399		1199	3	1199
4. Adop_FFGen_>=1/3GenT<2/3GenT	0.23936	4	0.23936		0	4	0
5. Adop_FFGen_<1/3GenTime	8.72915	5	8.72915		0	5	0
6. LateAdol_>=GenTime	0	6	0		0	6	0
7. LateAdol_<GenTime	3.38096	7	5.43047		452	7	726
8. Absent	0				0
9. Other situations	5.43047				726
Total	100		100		13369		13369
Table Gabon-1. Circumcision rate estimates for Libreville in 1934 and 1953. For the year 1953, the distribution of inhabitants by ethnic/regional origins is presented in Lasserre (1958), p.206. For the year 1934, we assume a distribution proportional to the 1949 one. The bottom of the table shows the distribution of people by the defined circumcision classes CL1 and CL2 (the latter used in the ch…

## Sheet: Cameroon
CAMEROON
Tables of ethnic composition of cities and estimates of circumcision classes and circumcision rates
		VARIABLES
		45		GenTimeAdopt
		30		GenTimeFFG
		Lower	Upper
		0	5	Absent
		97	99	CurrGeneral
		97	99	GenPuberty
		75	85	LateAdoles
		0	20	StartAdoption
		40	60	FarFromGen
		65	85	MajPuberty
TABLE Cameroon-1
DOUALA	1965
Ethnic group/ region of origin	% of popul.	Circ. CL1	% circumcised		Basis of circumcision estimate (see explanation in the Charts sheet)
			Lower	Upper	Ref.Time	Process	Initial situation	References
Duala & similar (Pongo, Malimba, Wouri)	18.9	2	97	99	1920	Generalization	MajPuberty	Cureau1915, Frobenius1929, Jensen1933, Frazer 1938, Ittmann1953, Bureau1962, Bureau1996, Gray1999, Bekombo-Priso2009, Hewlett
Mungo + Yabassi + Mbo + Abo + Bandem + Mbang	5.5	1	97	99			GenPuberty	Jensen1933, Ittmann1953, Bureau1996, Frobenius1929, Gray1999, Hewlett
Bassa + Bakoko	19.3	1	97	99			GenPuberty	Cureau1915, Nicol1929, Jensen1933, Frobenius1929, Schwab1947, Berlin1996
Beti + Eton + Yaunde + Bulu	8.2	6	97	99	1920	Advance to childhood	LateAdoles	Zenker1895, Jensen1933, Laburthe-Tolra1985, Laburthe-Tolra1999, Alexandre1958
Bamileke	34.2	2	97	99	1900	Generalization	FarFromGen	Frobenius1929, Jensen1933, Egerton1938, Lecoq1953, Littlewood1954, Gray1999, Hewlett
Bamun	1.6	2	97	99	1900	Generalization	FarFromGen	Frobenius1929, Littlewood1954b, Gray1999, Hewlett
Haoussa + Foulbé	1.5	1	97	99			GenPuberty	Henric1902, Hewlett, Gray1999
Central Bantu (Bafia, Banen, Sanaga, Niokon)	4.2	2	97	99	1895	Adoption	Absent	Tessmann1913, Dugast1954, Dugast1955, Frobenius1929, Gray1999, Hewlett
Others Cameroon (East, North, Kribi)	4.3	9	75	85				DHS, Tessmann1913, Koch1913, Jensen1933, Merfield1957, McCulloch1954, Baumann1962, Frobenius1929, Berlin1996, Gray1999, Hewlett
Foreigners	2.3	9	80	90				DHS, Delafosse1930, Bruel1935, Frazer1938, Schwab1947, Baumann1962, Cureau1915, Raponda-Walker1962, Gray1999, Hewlett, Frobenius1929
Total	100		95.663	98.191
Circumcision rate (weighted average)			95.663	98.191
Circumcision classes. CL1		CL2 (used in charts)
1. GenPuberty	26.3	1	93.4
2. Adop_FFGen_>=GenTime	58.9	2	0
3. Adop_FFGen_>=2/3GenT<GenT	0	3	0
4. Adop_FFGen_>=1/3GenT<2/3GenT	0	4	0
5. Adop_FFGen_<1/3GenTime	0	5	0
6. LateAdol_>=GenTime	8.2	6	0
7. LateAdol_<GenTime	0	7	6.6
8. Absent	0
9. Other situations	6.6
Total	100		100
Table Cameroon-1. Circumcision rate estimates for Douala in 1965. The distribution of inhabitants by ethnic/regional origins is presented in Mainet (1985), p.81. The bottom of the table shows the distribution of people by the defined circumcision classes CL1 and CL2 (the latter used in the charts of the Charts sheet). See additional explanations in the Charts sheet.
TABLE Cameroon-2
DOUALA	1935
Ethnic group/ region of origin	# of people	Circ. CL1	% circumcised		Basis of circumcision estimate (see explanation in the Charts sheet)
			Lower	Upper	Ref.Time	Process	Initial situation	References
Duala	19054	4	81	92	1920	Generalization	MajPuberty	Cureau1915, Frobenius1929, Jensen1933, Frazer 1938, Ittmann1953, Bureau1962, Bureau1996, Gray1999, Bekombo-Priso2009, Hewlett
Bassa	1819	1	97	99			GenPuberty	Schwab1947
Bakoko	4310	1	97	99			GenPuberty	Nicol1929, Jensen1933, Frobenius1929
Baboute	572	1	97	99			GenPuberty	Gausset1999, Gray1999
Bamvele + Sanaga	600	3	75.4444	81.4444	1900	Adoption	Absent	Frobenius1929
Bafia	993	2	97	99	1890	Adoption	Absent	Tessmann1913, Jensen1933, Dugast1954, Dugast1955, Frobenius1929, Gray1999, Hewlett
Bamun	214	3	97	99	1900	Generalization	FarFromGen	Jensen1933, Frobenius1929, Littlewood1954b, Gray1999, Hewlett
Batanga + Ngumba	348	4	81	92	1920	Generalization	MajPuberty	Cureau1915, Jensen1933, Frazer1938, Frobenius1929, Gray1999, Hewlett
Boulou	520	7	86	92	1920	Advance to childhood	LateAdoles	Laburthe-Tolra1985, Laburthe-Tolra1999, Alexandre1958
Grassfields	3717	3	97	99	1900	Generalization	FarFromGen	Malcolm1925, Frobenius1929, Jensen1933, Egerton1938, Lecoq1953, Littlewood1954, McCulloch1954, Gray1999, Hewlett
Haoussa + Chadian Arab	1102	1	97	99			GenPuberty	Henric1902, Hewlett, Gray1999
Lagoti + Bayangui (=Banyang)	560	1	97	99			GenPuberty	Jensen1933, Ittmann1953, Baumann1962, Gray1999, Hewlett
Maka	273	1	97	99			GenPuberty	Koch1913, Allys1930, Merfield1957, Frobenius1929, Laurent2004
Mbo / Bakossi / Kundu	1200	1	97	99			GenPuberty	Jensen1933, Ittmann1953, Frobenius1929, Gray1999
Senegal + Togo	600	9	60	80				Frazer1938, Delafosse1912, Delafosse1930, Zaborowski1896, Frobenius1929, Gray1999, Hewlett
Yabassi / Bandem	2764	2	97	99	1880	Adoption	Absent	Jensen1933, Frobenius1929
Yaunde	4514	7	86	92	1920	Advance to childhood	LateAdoles	Zenker1895, Jensen1933, Laburthe-Tolra1985, Laburthe-Tolra1999, Alexandre1958
Accra + S.Leone + Liberia	213	9	40	60				Clarke1863, Migeod1925, Strong1930, Schwab1947, Gray1999, Hewlett
Congo + Dahomey + Gabon	489	9	80	92				Courboin1904, Torday1928, Delafosse1930, Bruel1935, Frazer1938, Baumann1962, Cureau1915, Raponda-Walker1962, Gray1999, Hewlett, Frobenius1929
Total	43862		38332.2	41376.2
Circumcision rate (weighted average)			87.3927	94.3327
Circumcision classes. CL1		CL2 (used in charts)
1. GenPuberty	9836	1	13593
2. Adop_FFGen_>=GenTime	3757	2	5034
3. Adop_FFGen_>=2/3GenT<GenT	4531	3	4531
4. Adop_FFGen_>=1/3GenT<2/3GenT	19402	4	19402
5. Adop_FFGen_<1/3GenTime	0	5	0
6. LateAdol_>=GenTime	0	6	0
7. LateAdol_<GenTime	5034	7	1302
8. Absent	0
9. Other situations	1302
Total	43862		43862
Table Cameroon-2. Circumcision rate estimates for Douala in 1935. The distribution of inhabitants by ethnic/regional origins is presented in Service de Santé (1935). The bottom of the table shows the distribution of people by the defined circumcision classes CL1 and CL2 (the latter used in the charts of the Charts sheet). See additional explanations in the Charts sheet.
TABLE Cameroon-3
DOUALA	1925
Ethnic group/ region of origin	% of popul.	Circ. CL1	% circumcised		Basis of circumcision estimate (see explanation in the Charts sheet)
			Lower	Upper	Ref.Time	Process	Initial situation	References
Duala	65.6881	5	70.3333	87.3333	1920	Generalization	MajPuberty	Cureau1915, Frobenius1929, Jensen1933, Frazer 1938, Ittmann1953, Bureau1962, Bureau1996, Gray1999, Bekombo-Priso2009, Hewlett
Bassa	2.01765	1	97	99			GenPuberty	Schwab1947
Bakoko	4.70917	1	97	99			GenPuberty	Nicol1929, Jensen1933, Frobenius1929
Others	27.5851
Other groups:
Baboute	0.844729	1	97	99			GenPuberty	Gausset1999, Gray1999
Bamvele + Sanaga	0.886079	4	53.8889	63.8889	1900	Adoption	Absent	Frobenius1929
Bafia	1.46646	3	75.4444	81.4444	1890	Adoption	Absent	Tessmann1913, Jensen1933, Dugast1954, Dugast1955, Frobenius1929, Gray1999, Hewlett
Bamun	0.316035	4	87.5	92.5	1900	Generalization	FarFromGen	Jensen1933, Frobenius1929, Littlewood1954b, Gray1999, Hewlett
Batanga + Ngumba	0.513926	5	70.3333	87.3333	1920	Generalization	MajPuberty	Cureau1915, Jensen1933, Frazer1938, Frobenius1929, Gray1999, Hewlett
Boulou	0.767935	7	78.6667	87.3333	1920	Advance to childhood	LateAdoles	Laburthe-Tolra1985, Laburthe-Tolra1999, Alexandre1958
Grassfields	5.48926	4	87.5	92.5	1900	Generalization	FarFromGen	Malcolm1925, Frobenius1929, Jensen1933, Egerton1938, Lecoq1953, Littlewood1954, McCulloch1954, Gray1999, Hewlett
Haoussa + Chadian Arab	1.62743	1	97	99			GenPuberty	Henric1902, Hewlett, Gray1999
Lagoti + Bayangui (=Banyang)	0.827007	1	97	99			GenPuberty	Jensen1933, Ittmann1953, Baumann1962, Gray1999, Hewlett
Maka	0.403166	1	97	99			GenPuberty	Koch1913, Allys1930, Merfield1957, Frobenius1929, Laurent2004
Mbo / Bakossi / Kundu	1.77216	1	97	99			GenPuberty	Jensen1933, Ittmann1953, Frobenius1929, Gray1999
Senegal + Togo	0.886079	9	60	80				Frazer1938, Delafosse1912, Delafosse1930, Zaborowski1896, Frobenius1929, Gray1999, Hewlett
Yabassi / Bandem	4.08187	2	97	99	1880	Adoption	Absent	Jensen1933, Frobenius1929
Yaunde	6.66627	7	78.6667	87.3333	1920	Advance to childhood	LateAdoles	Zenker1895, Jensen1933, Laburthe-Tolra1985, Laburthe-Tolra1999, Alexandre1958
Accra + S.Leone + Liberia	0.314558	9	40	60				Clarke1863, Migeod1925, Strong1930, Schwab1947, Gray1999, Hewlett
Congo + Dahomey + Gabon	0.722154	9	80	92				Courboin1904, Torday1928, Delafosse1930, Bruel1935, Frazer1938, Baumann1962, Cureau1915, Raponda-Walker1962, Gray1999, Hewlett, Frobenius1929
Total of Other Groups	27.5851
Total	100		76.1037	89.1216
Circumcision rate (weighted average)			76.1037	89.1216
Circumcision classes. CL1		CL2 (used in charts)
1. GenPuberty	12.2013	1	16.2832
2. Adop_FFGen_>=GenTime	4.08187	2	7.4342
3. Adop_FFGen_>=2/3GenT<GenT	1.46646	3	1.46646
4. Adop_FFGen_>=1/3GenT<2/3GenT	6.69137	4	6.69137
5. Adop_FFGen_<1/3GenTime	66.202	5	66.202
6. LateAdol_>=GenTime	0	6	0
7. LateAdol_<GenTime	7.4342	7	1.92279
8. Absent	0
9. Other situations	1.92279
Total	100		100
Table Cameroon-3. Circumcision rate estimates for Douala in 1925. We obtained reliable counts of the groups Duala, "Bassa+Bakoko", and "Others" in Gouellain (1975, p.286) and Mainet (1985, p.61). We assumed the Bassa and Bakoko had the same proportions relative to one another as in the 1935 survey (Table Cameroon-2). We assumed the remaining groups had the same proportions, among themselves and w…
TABLE Cameroon-4
YAOUNDÉ	1957
Ethnic group/ region of origin	% of popul.	Circ. CL1	% circumcised		Basis of circumcision estimate (see explanation in the Charts sheet)
			Lower	Upper	Ref.Time	Process	Initial situation	References
Yaunde + Beti + Pahouin	31600	7	97	99	1920	Advance to childhood	LateAdoles	Zenker1895, Jensen1933, Laburthe-Tolra1985, Laburthe-Tolra1999, Alexandre1958
Bassa + Bakoko	4100	1	97	99			GenPuberty	Nicol1929, Frobenius1929, Jensen1933, Schwab1947
Bamileke	9600	2	97	99	1900	Generalization	FarFromGen	Frobenius1929, Jensen1933, Egerton1938, Lecoq1953, Littlewood1954, Gray1999, Hewlett
Central Bantu	3200	2	97	99	1895	Adoption	Absent	Tessmann1913, Jensen1933, Dugast1954, Dugast1955, McCulloch1954, Frobenius1929, Gray1999, Hewlett
Others	4200	9	80	90				DHS, Koch1913, Allys1930, Torday1928, Delafosse1930, Jensen1933, Bruel1935, Frazer1938, Schwab1947, Forde1954, Merfield1957, Baumann1962, Cureau1915, Raponda-Walker1962, Gray1999, Hewlett, Frobenius1929, Laurent2004
Total	52700		50405	51795
Circumcision rate (weighted average)			95.6452	98.2827
Circumcision classes. CL1		CL2 (used in charts)
1. GenPuberty	4100	1	16900
2. Adop_FFGen_>=GenTime	12800	2	31600
3. Adop_FFGen_>=2/3GenT<GenT	0	3	0
4. Adop_FFGen_>=1/3GenT<2/3GenT	0	4	0
5. Adop_FFGen_<1/3GenTime	0	5	0
6. LateAdol_>=GenTime	0	6	0
7. LateAdol_<GenTime	31600	7	4200
8. Absent	0
9. Other situations	4200
Total	52700		52700
Table Cameroon-4. Circumcision rate estimates for Yaoundé in 1957. The distribution of inhabitants by ethnic/regional origins is presented in Roubaud (1994), p.9. The bottom of the table shows the distribution of people by the defined circumcision classes CL1 and CL2 (the latter used in the charts of the Charts sheet). See additional explanations in the Charts sheet.

## Sheet: GBissau
GUINEA-BISSAU / PORTUGUESE GUINEA
Tables of ethnic composition of cities and estimates of circumcision classes and circumcision rates
		VARIABLES
		45		GenTimeAdopt
		30		GenTimeFFG
		Lower	Upper
		0	5	Absent
		97	99	CurrGeneral
		97	99	GenPuberty
		75	85	LateAdoles
		0	20	StartAdoption
		40	60	FarFromGen
		65	85	MajPuberty
TABLE GBissau-1
BISSAU	1950
Ethnic group/ region of origin	# of people	Circ. CL1	% circumcised		Basis of circumcision estimate (see explanation in the Charts sheet)
			Lower	Upper	Ref.Time	Process	Initial situation	References
Westernized Africans	2658	5	40	60			FarFromGen	Cureau1915, CarvalhoViegas1936, SobralGonçalves1973, Berlin1996, Drain2006
Papel	8858	4	60	80			GenPuberty	Zaborowski1896, Frobenius1929, CarvalhoViegas1936, Carreira1962, Niang2007, Gray1999, Hewlett
Balanta	2961	8	25	35			Special	Zaborowski1896, CarvalhoViegas1936, Carreira1961b, Machado1972, Niang2007, Gray1999, Hewlett, Frobenius1929
Brame/Mancanha	1608	1	97	99			GenPuberty	Zaborowski1896, Frobenius1929, CarvalhoViegas1936, Carreira1961, Gray1999, Hewlett
Manjaco	1862	1	97	99			GenPuberty	CarvalhoViegas1936, Meireles1960, Lagarde2003
Mandinga	1099	1	97	99			GenPuberty	Zaborowski1896, CarvalhoViegas1936, Delafosse1930, Frazer1938, Quintino1969, Niang2007, Gray1999, Hewlett
Total	19046		11550.2	14240.9
Circumcision rate (weighted average)			60.6436	74.7709
Circumcision classes. CL1		CL2 (used in charts)
1. GenPuberty	4569	1	4569
2. Adop_FFGen_>=GenTime	0	2	0
3. Adop_FFGen_>=2/3GenT<GenT	0	3	0
4. Adop_FFGen_>=1/3GenT<2/3GenT	8858	4	8858
5. Adop_FFGen_<1/3GenTime	2658	5	2658
6. LateAdol_>=GenTime	0	6	2961
7. LateAdol_<GenTime	0	7	0
8. Absent	2961
9. Other situations	0
Total	19046		19046
Table GBissau-1. Circumcision rate estimates for Bissau in 1950. The distribution of inhabitants by ethnic/regional origins is presented in Carreira (1962), p.282, and in Junta de Investigação do Ultramar (1950). The bottom of the table shows the distribution of people by the defined circumcision classes CL1 and CL2 (the latter used in the charts of the Charts sheet). See additional explanations …
TABLE GBissau-2
BISSAU	1940
Ethnic group/ region of origin	% of popul. (3 scenarios)			Circ. CL1	% circumcised		Basis of circumcision estimate (see explanation in the Charts sheet)
	Scen. 1	Scen. 2	Scen. 3		Lower	Upper	Ref.Time	Process	Initial situation	References
Mullato	51.65	51.65	51.65	5	40	60			FarFromGen	Cureau1915, CarvalhoViegas1936, SobralGonçalves1973, Berlin1996, Drain2006
Papel	26.13	20	26.13	4	60	80			GenPuberty	Zaborowski1896, Frobenius1929, CarvalhoViegas1936, Carreira1962, Niang2007, Gray1999, Hewlett
Balanta	8.74	15	6	8	25	35			Special	Zaborowski1896, CarvalhoViegas1936, Carreira1961b, Machado1972, Niang2007, Gray1999, Hewlett, Frobenius1929
Brame/Mancanha	4.74	4.61	5	1	97	99			GenPuberty	Zaborowski1896, Frobenius1929, CarvalhoViegas1936, Carreira1961, Gray1999, Hewlett
Manjaco	5.5	5.5	5.5	1	97	99			GenPuberty	CarvalhoViegas1936, Meireles1960, Lagarde2003
Mandinga	3.24	3.24	5.72	1	97	99			GenPuberty	Zaborowski1896, Delafosse1930, CarvalhoViegas1936, Frazer1938, Quintino1969, Niang2007, Gray1999, Hewlett
Total	100	100	100
Circumcision rate (weighted average) - Scen. 1					51.5986	68.2982
« - Scen. 2					49.3595	65.4565
« - Scen. 3					53.5714	70.0518
Limits of the three scenarios					49.3595	70.0518
Circumcision classes. CL1		CL2 (used in charts)
1. GenPuberty	13.48	1	13.48
2. Adop_FFGen_>=GenTime	0	2	0
3. Adop_FFGen_>=2/3GenT<GenT	0	3	0
4. Adop_FFGen_>=1/3GenT<2/3GenT	26.13	4	26.13
5. Adop_FFGen_<1/3GenTime	51.65	5	51.65
6. LateAdol_>=GenTime	0	6	8.74
7. LateAdol_<GenTime	0	7	0
8. Absent	8.74
9. Other situations	0
Total	100		100
Table GBissau-2. Circumcision rate estimates for Bissau in 1940. We obtained reliable counts of the groups "Mullato" and "Other Africans" in Província da Guiné (1940). We defined three scenarios for the relative proportions of the remaining groups. In scenario 1, we assumed the remaining groups had the same proportions as they have in the 1950 census (excluding the Westernized Africans) (Table GB…

## Sheet: Guinea
GUINEA-CONAKRY / FRENCH GUINEA
Tables of ethnic composition of cities and estimates of circumcision classes and circumcision rates
		VARIABLES
		45		GenTimeAdopt
		30		GenTimeFFG
		Lower	Upper
		0	5	Absent
		97	99	CurrGeneral
		97	99	GenPuberty
		75	85	LateAdoles
		0	20	StartAdoption
		40	60	FarFromGen
		65	85	MajPuberty
TABLE Guinea-1
CONAKRY	1950
Ethnic group/ region of origin	# of people	Circ. CL1	% circumcised		Basis of circumcision estimate (see explanation in the Charts sheet)
			Lower	Upper	Ref.Time	Process	Initial situation	References
Soussou	20000	7	97	99	1920	Advance to childhood	LateAdoles	Zaborowski1896, Delafosse1930, Frazer1938, Gray1999, Hewlett
Baga	8500	1	97	99			GenPuberty	Delafosse1930, Gray1999, Hewlett
Peul / Futajalon	8500	1	97	99			GenPuberty	Zaborowski1896, Gray1999, Hewlett
Kissi	1000	1	97	99			GenPuberty	Delafosse1930, Paulme1947, Gray1999, Hewlett
Toma + Loma	700	1	97	99			GenPuberty	Delafosse1930, Gray1999, Hewlett
Others (Malinke, Somono, Temne, Kru, Wolof, Lebu)	7300	9	85	95				Clarke1863, Zaborowski1896, Jensen1933, Biyi1929, Strong1930, Schwab1947, Delafosse1930, Frazer1938, Gray1999, Hewlett
Total	46000		43744	45248
Circumcision rate (weighted average)			95.0957	98.3652
Circumcision classes. CL1		CL2 (used in charts)
1. GenPuberty	18700	1	18700
2. Adop_FFGen_>=GenTime	0	2	20000
3. Adop_FFGen_>=2/3GenT<GenT	0	3	0
4. Adop_FFGen_>=1/3GenT<2/3GenT	0	4	0
5. Adop_FFGen_<1/3GenTime	0	5	0
6. LateAdol_>=GenTime	0	6	0
7. LateAdol_<GenTime	20000	7	7300
8. Absent	0
9. Other situations	7300
Total	46000		46000
Table Guinea-1. Circumcision rate estimates for Conakry in 1950. The distribution of inhabitants by ethnic/regional origins is presented in Goerg (1990), p.96. The bottom of the table shows the distribution of people by the defined circumcision classes CL1 and CL2 (the latter used in the charts of the Charts sheet). See additional explanations in the Charts sheet.
TABLE Guinea-2
CONAKRY	1936
Ethnic group/ region of origin	# of people	Circ. CL1	% circumcised		Basis of circumcision estimate (see explanation in the Charts sheet)
			Lower	Upper	Ref.Time	Process	Initial situation	References
Soussou	4693	7	86.7333	92.4667	1920	Advance to childhood	LateAdoles	Zaborowski1896, Delafosse1930, Frazer1938, Gray1999, Hewlett
Baga	3576	1	97	99			GenPuberty	Delafosse1930, Gray1999, Hewlett
Peul / Futajalon	799	1	97	99			GenPuberty	Zaborowski1896, Gray1999, Hewlett
Malinke	744	1	90	94			GenPuberty	Zaborowski1896, Delafosse1912, Frazer1938, Niang2007, Frobenius1929, Gray1999, Hewlett
Sierra Leonese	800	1	97	99			GenPuberty	Clarke1863, Migeod1925, Gray1999, Hewlett
Others (Toma, Kissi, Somono, Kru, Toucouleurs, Wolof, Lebu)	666	9	72	84				Clarke1863, Zaborowski1896, Jensen1933, Biyi1929, Strong1930, Schwab1947, Delafosse1930, Frazer1938, Gray1999, Hewlett
Total	11278		10239.3	10721.5
Circumcision rate (weighted average)			90.7897	95.0657
Circumcision classes. CL1		CL2 (used in charts)
1. GenPuberty	5919	1	5919
2. Adop_FFGen_>=GenTime	0	2	4693
3. Adop_FFGen_>=2/3GenT<GenT	0	3	0
4. Adop_FFGen_>=1/3GenT<2/3GenT	0	4	0
5. Adop_FFGen_<1/3GenTime	0	5	0
6. LateAdol_>=GenTime	0	6	0
7. LateAdol_<GenTime	4693	7	666
8. Absent	0
9. Other situations	666
Total	11278		11278
Table Guinea-2. Circumcision rate estimates for Conakry in 1936. The distribution of inhabitants by ethnic/regional origins is presented in Goerg (2006), p.11, and Goerg (1990), p.90. The bottom of the table shows the distribution of people by the defined circumcision classes CL1 and CL2 (the latter used in the charts of the Charts sheet). See additional explanations in the Charts sheet.
TABLE Guinea-3
CONAKRY	1923
Ethnic group/ region of origin	# of people (3 scenarios)			Circ. CL1	% circumcised		Basis of circumcision estimate (see explanation in the Charts sheet)
	Scen. 1	Scen. 2	Scen. 3		Lower	Upper	Ref.Time	Process	Initial situation	References
Wolof	1000	1000	1000	4	83.7	89.9	1900	Generalization	FarFromGen	Zaborowski1896, Frobenius1929, Jensen1933, Gray1999, Niang2007
Sierra Leonese	600	600	600	1	97	99			GenPuberty	Clarke1863, Migeod1925, Gray1999, Hewlett
Mullato	120	120	120	2	40	60			FarFromGen	Cureau1915, Porter1953, SobralGonçalves1973, Berlin1996, Drain2006
Soussou	4926	5000	4223	7	77.2	86.4	1920	Advance to childhood	LateAdoles	Zaborowski1896, Delafosse1930, Frazer1938, Gray1999, Hewlett
Baga	3754	3060	3217	1	97	99			GenPuberty	Delafosse1930, Gray1999, Hewlett
Peul / Futajalon + Malinke	2800	2340	1920	1	97	99			GenPuberty	Zaborowski1896, Delafosse1912, Frazer1938, Niang2007, Frobenius1929, Gray1999, Hewlett
Kru	250	300	150	8	0	16.4889	1925	Adoption	Absent	Biyi1929, Jensen1933, Strong1930, Schwab1947, Baumann1962, Hewlett
Others (Kissi, Somono, Toucouleurs, others)	550	580	770	1	97	99			GenPuberty	Clarke1863, Zaborowski1896, Biyi1929, Strong1930, Jensen1933, Schwab1947, Delafosse1930, Frazer1938, Gray1999, Hewlett
Total	14000	13000	12000
Circumcision rate (weighted average) - Scen. 1					86.8625	92.1089
« - Scen. 2					85.5969	91.1897
« - Scen. 3					87.1412	92.3861
Limits of the three scenarios					85.5969	92.3861
Circumcision classes. CL1		CL2 (used in charts)
1. GenPuberty	7704	1	7824
2. Adop_FFGen_>=GenTime	120	2	4926
3. Adop_FFGen_>=2/3GenT<GenT	0	3	0
4. Adop_FFGen_>=1/3GenT<2/3GenT	1000	4	1000
5. Adop_FFGen_<1/3GenTime	0	5	0
6. LateAdol_>=GenTime	0	6	250
7. LateAdol_<GenTime	4926	7	0
8. Absent	250
9. Other situations	0
Total	14000		14000
Table Guinea-3. Circumcision rate estimates for Conakry in 1923. We obtained estimated numbers of the groups Wolof, Sierra Leonese, and Mullato in Goerg (1990). We defined three scenarios for the counts of the remaining groups based on various statements taken from Goerg (1990, 2006), quantifying either the numbers or the percentages of the most important groups (Soussou, Baga, Peul), for several…

## Sheet: SLeone
SIERRA LEONE
Tables of ethnic composition of cities and estimates of circumcision classes and circumcision rates
		VARIABLES
		45		GenTimeAdopt
		30		GenTimeFFG
		Lower	Upper
		0	5	Absent
		97	99	CurrGeneral
		97	99	GenPuberty
		75	85	LateAdoles
		0	20	StartAdoption
		40	60	FarFromGen
		65	85	MajPuberty
TABLE SLeone-1
FREETOWN	1963
Ethnic group/ region of origin	# of people	Circ. CL1	% circumcised		Basis of circumcision estimate (see explanation in the Charts sheet)
			Lower	Upper	Ref.Time	Process	Initial situation	References
Creole	27730	1	97	99			GenPuberty	Porter1953
Fula	6533	1	97	99			GenPuberty	Zaborowski1896, Gray1999, Hewlett
Gallinas	91	1	97	99			GenPuberty	Strong1930, Schwab1947, Gray1999, Hewlett
Gola	6	1	97	99			GenPuberty	Schwab1947, Frobenius1929
Kissi	774	1	97	99			GenPuberty	Delafosse1930, Paulme1947, Gray1999, Hewlett
Kono	540	1	97	99			GenPuberty	Migeod1925, Tully1994
Krim (=Bullom)	29	1	97	99			GenPuberty	Zaborowski1896
Kru	4461	3	81.9111	86.7111	1925	Adoption	Absent	Biyi1929, Strong1930, Jensen1933, Schwab1947, Baumann1962, Hewlett
Koranko	257	1	97	99			GenPuberty	Gray1999, Hewlett
Limba	18410	1	97	99			GenPuberty	Hewlett
Loko	5842	1	97	99			GenPuberty	Hewlett
Mandingo / Mandinka	3141	1	97	99			GenPuberty	Zaborowski1896, Frazer1938, Gray1999, Hewlett
Mende	12561	1	97	99			GenPuberty	Clarke1863, Migeod1925, Jedrej1986, Gray1999, Hewlett
Sherbro	3051	1	97	99			GenPuberty	Clarke1863, Frazer1938, Gray1999
Susu	3865	7	97	99	1920	Advance to childhood	LateAdoles	Zaborowski1896, Delafosse1930, Frazer1938, Gray1999, Hewlett
Temne	30595	1	97	99			GenPuberty	Clarke1863, Zaborowski1896, Gray1999, Hewlett
Vai	88	1	97	99			GenPuberty	Strong1930, Schwab1947, Gray1999, Hewlett
Yalunka	124	1	97	99			GenPuberty	Delafosse1912, Gray1999, Hewlett
Others	9819	1	97	99			GenPuberty	Clarke1863, Zaborowski1896, Migeod1925, Biyi1929, Strong1930, Schwab1947, Delafosse1930, Frazer1938, Paulme1971, Tully1994, Gray1999, Hewlett
Total	127917		123406	126090
Circumcision rate (weighted average)			96.4738	98.5714
Circumcision classes. CL1		CL2 (used in charts)
1. GenPuberty	119591	1	119591
2. Adop_FFGen_>=GenTime	0	2	3865
3. Adop_FFGen_>=2/3GenT<GenT	4461	3	4461
4. Adop_FFGen_>=1/3GenT<2/3GenT	0	4	0
5. Adop_FFGen_<1/3GenTime	0	5	0
6. LateAdol_>=GenTime	0	6	0
7. LateAdol_<GenTime	3865	7	0
8. Absent	0
9. Other situations	0
Total	127917		127917
Table SLeone-1. Circumcision rate estimates for Freetown in 1963. The distribution of inhabitants by ethnic/regional origins is presented in Harvey (1971), p.98. The bottom of the table shows the distribution of people by the defined circumcision classes CL1 and CL2 (the latter used in the charts of the Charts sheet). See additional explanations in the Charts sheet.
TABLE SLeone-2
FREETOWN	1931				1953
Ethnic group/ region of origin	# of people	Circ. CL1	% circumcised		# of people	Circ. CL1	% circumcised		Basis of circumcision estimate (see explanation in the Charts sheet)
			Lower	Upper			Lower	Upper	Ref.Time	Process	Initial situation	References
Creoles / Krio	20970	1	97	99	17000	1	97	99			GenPuberty	Porter1953
Temne	11405	1	97	99	19000	1	97	99			GenPuberty	Clarke1863, Zaborowski1896, Gray1999, Hewlett
Mende	3828	1	97	99	11000	1	97	99			GenPuberty	Clarke1863, Migeod1925, Jedrej1986, Gray1999, Hewlett
Limba	4960	1	97	99	9000	1	97	99			GenPuberty	Hewlett
Kru	4460	5	12.9333	30.5333	7000	4	60.3556	69.1556	1925	Adoption	Absent	Biyi1929, Strong1930, Jensen1933, Schwab1947, Baumann1962, Hewlett
Loko	1633	1	97	99	4000	1	97	99			GenPuberty	Hewlett
Mandinka	1352	1	97	99	4000	1	97	99			GenPuberty	Zaborowski1896, Frazer1938, Gray1999, Hewlett
Fula	1119	1	97	99	4000	1	97	99			GenPuberty	Zaborowski1896, Gray1999, Hewlett
Susu	1450	7	83.0667	90.1333	2500	7	97	99	1920	Advance to childhood	LateAdoles	Zaborowski1896, Delafosse1930, Frazer1938, Gray1999, Hewlett
Others	4181	1	97	99	7500	1	97	99			GenPuberty	Clarke1863, Zaborowski1896, Migeod1925, Biyi1929, Strong1930, Paulme1947, Schwab1947, Delafosse1930, Frazer1938, Paulme1971, Tully1994, Gray1999, Hewlett
Total	55358		49745.9	51622.2	85000		79884.9	82060.9
Circumcision rate (weighted average)			89.8621	93.2516			93.9822	96.5422
Circumcision classes. CL1		CL2 (used in charts)				CL2 (used in charts)
1. GenPuberty	49448	1	49448		75500	1	75500
2. Adop_FFGen_>=GenTime	0	2	1450		0	2	2500
3. Adop_FFGen_>=2/3GenT<GenT	0	3	0		0	3	0
4. Adop_FFGen_>=1/3GenT<2/3GenT	0	4	0		7000	4	7000
5. Adop_FFGen_<1/3GenTime	4460	5	4460		0	5	0
6. LateAdol_>=GenTime	0	6	0		0	6	0
7. LateAdol_<GenTime	1450	7	0		2500	7	0
8. Absent	0				0
9. Other situations	0				0
Total	55358		55358		85000		85000
Table SLeone-2. Circumcision rate estimates for Freetown in 1931 and 1953. The distribution of inhabitants by ethnic/regional origins is presented in Banton (1956), p.355. The bottom of the table shows the distribution of people by the defined circumcision classes CL1 and CL2 (the latter used in the charts of the Charts sheet). See additional explanations in the Charts sheet.
TABLE SLeone-3
FREETOWN	1911				1921
Ethnic group/ region of origin	# of people	Circ. CL1	% circumcised		# of people	Circ. CL1	% circumcised		Basis of circumcision estimate (see explanation in the Charts sheet)
			Lower	Upper			Lower	Upper	Ref.Time	Process	Initial situation	References
Creoles / Krio	16716	1	97	99	15791	1	97	99			GenPuberty	Porter1953
Temne	5007	1	97	99	8358	1	97	99			GenPuberty	Clarke1863, Zaborowski1896, Gray1999, Hewlett
Mende	2557	1	97	99	4094	1	97	99			GenPuberty	Clarke1863, Migeod1925, Jedrej1986, Gray1999, Hewlett
Limba	1611	1	97	99	2941	1	97	99			GenPuberty	Hewlett
Kru	1551	8	0	5	4744	8	0	12.9778	1925	Adoption	Absent	Biyi1929, Strong1930, Jensen1933, Schwab1947, Baumann1962, Hewlett
Loko	382	1	97	99	775	1	97	99			GenPuberty	Hewlett
Mandinka	1021	1	97	99	1461	1	97	99			GenPuberty	Zaborowski1896, Frazer1938, Gray1999, Hewlett
Fula	289	1	97	99	499	1	97	99			GenPuberty	Zaborowski1896, Gray1999, Hewlett
Susu	1311	7	75	85	1346	7	75.7333	85.4667	1920	Advance to childhood	LateAdoles	Zaborowski1896, Delafosse1930, Frazer1938, Gray1999, Hewlett
Others	3645	1	97	99	4133	1	97	99			GenPuberty	Clarke1863, Zaborowski1896, Migeod1925, Biyi1929, Strong1930, Paulme1947, Schwab1947, Delafosse1930, Frazer1938, Paulme1971, Tully1994, Gray1999, Hewlett
Total	34090		31274.4	32107.6	44142		37929.8	39437.5
Circumcision rate (weighted average)			91.7407	94.1849			85.9268	89.3424
Circumcision classes. CL1		CL2 (used in charts)				CL2 (used in charts)
1. GenPuberty	31228	1	31228		38052	1	38052
2. Adop_FFGen_>=GenTime	0	2	1311		0	2	1346
3. Adop_FFGen_>=2/3GenT<GenT	0	3	0		0	3	0
4. Adop_FFGen_>=1/3GenT<2/3GenT	0	4	0		0	4	0
5. Adop_FFGen_<1/3GenTime	0	5	0		0	5	0
6. LateAdol_>=GenTime	0	6	1551		0	6	4744
7. LateAdol_<GenTime	1311	7	0		1346	7	0
8. Absent	1551				4744
9. Other situations	0				0
Total	34090		34090		44142		44142
Table SLeone-3. Circumcision rate estimates for Freetown in 1911 and 1921. The distribution of inhabitants by ethnic/regional origins is presented in Banton (1956), p.355. The bottom of the table shows the distribution of people by the defined circumcision classes CL1 and CL2 (the latter used in the charts of the Charts sheet). See additional explanations in the Charts sheet.

## Sheet: Liberia
LIBERIA
Tables of ethnic composition of cities and estimates of circumcision classes and circumcision rates
		VARIABLES
		45		GenTimeAdopt
		30		GenTimeFFG
		Lower	Upper
		0	5	Absent
		97	99	CurrGeneral
		97	99	GenPuberty
		75	85	LateAdoles
		0	20	StartAdoption
		40	60	FarFromGen
		65	85	MajPuberty
TABLE Liberia-1
MONROVIA	1958
Ethnic group/ region of origin	# of people	Circ. CL1	% circumcised		Basis of circumcision estimate (see explanation in the Charts sheet)
			Lower	Upper	Ref.Time	Process	Initial situation	References
Westernized	8480	1	97	99			GenPuberty	DHS, Strong1930, Jensen1933, Fraenkel1964
Kru + Grebo	13250	3	71.1333	77.9333	1925	Adoption	Absent	DHS, Biyi1929, Strong1930, Jensen1933, Schwab1947, Baumann1962, Hewlett
Bassa + De	10600	1	97	99			GenPuberty	Biyi1929, Hewlett
Vai + Mende + Gola	7950	1	97	99			GenPuberty	Clarke1863, Zaborowski1896, Migeod1925, Strong1930, Schwab1947, Baumann1962, Gray1999, Hewlett
Kpelle + Loma	5300	1	97	99			GenPuberty	Delafosse1930, Schwab1947, Gray1999, Hewlett
Other Liberians	3710	1	97	99			GenPuberty	Biyi1929, Strong1930, Schwab1947, Baumann1962, Gray1999, Hewlett
Foreigners	3710	1	97	99			GenPuberty	Clarke1863, Zaborowski1896, Migeod1925, Biyi1929, Strong1930, Paulme1947, Schwab1947, Porter1953, Delafosse1930, Frazer1938, Paulme1971, Tully1994, Gray1999, Hewlett
Total	53000		47982.7	49678.7
Circumcision rate (weighted average)			90.5333	93.7333
Circumcision classes. CL1		CL2 (used in charts)
1. GenPuberty	39750	1	39750
2. Adop_FFGen_>=GenTime	0	2	0
3. Adop_FFGen_>=2/3GenT<GenT	13250	3	13250
4. Adop_FFGen_>=1/3GenT<2/3GenT	0	4	0
5. Adop_FFGen_<1/3GenTime	0	5	0
6. LateAdol_>=GenTime	0	6	0
7. LateAdol_<GenTime	0	7	0
8. Absent	0
9. Other situations	0
Total	53000		53000
Table Liberia-1. Circumcision rate estimates for Monrovia in 1958. The distribution of inhabitants by ethnic/regional origins is presented in Fraenkel (1964), p.36. The bottom of the table shows the distribution of people by the defined circumcision classes CL1 and CL2 (the latter used in the charts of the Charts sheet). See additional explanations in the Charts sheet.
TABLE Liberia-2
MONROVIA	1939
Ethnic group/ region of origin	# of people	Circ. CL1	% circumcised		Basis of circumcision estimate (see explanation in the Charts sheet)
			Lower	Upper	Ref.Time	Process	Initial situation	References
Westernized	6200	1	97	99			GenPuberty	DHS, Strong1930, Jensen1933, Fraenkel1964
Kru + Grebo	2320	5	30.1778	44.5778	1925	Adoption	Absent	Biyi1929, Strong1930, Jensen1933, Schwab1947, Baumann1962, Hewlett
Others	3480	1	97	99			GenPuberty	Migeod1925, Biyi1929, Strong1930, Paulme1947, Schwab1947, Porter1953, Baumann1962, Gray1999, Hewlett
Total	12000		10089.7	10617.4
Circumcision rate (weighted average)			84.081	88.4784
Circumcision classes. CL1		CL2 (used in charts)
1. GenPuberty	9680	1	9680
2. Adop_FFGen_>=GenTime	0	2	0
3. Adop_FFGen_>=2/3GenT<GenT	0	3	0
4. Adop_FFGen_>=1/3GenT<2/3GenT	0	4	0
5. Adop_FFGen_<1/3GenTime	2320	5	2320
6. LateAdol_>=GenTime	0	6	0
7. LateAdol_<GenTime	0	7	0
8. Absent	0
9. Other situations	0
Total	12000		12000
Table Liberia-2. Circumcision rate estimates for Monrovia in 1939. We obtained estimated numbers of the Westernized based on their being 5,000 in 1926 (Strong 1930, p.37; Fraenkel 1964, p.33), 8,480 in 1958 (Table Liberia-1), and interpolating in between, using the resultant exponential growth rate. With the less stable Kru and Grebo, we assumed they were 40% of the remaining, in line of this per…

[truncated: 1 more sheets: IvoryC]
