# Supplementary material for: High GUD Incidence in the Early 20th Century Created a Particularly Permissive Time Window for the Origin and Initial Spread of Epidemic HIV Strains
Source: PLOS journal article supplement (doi:10.1371/journal.pone.0009936), 2010-04-01
Supplement: S2 (10.1371/journal.pone.0009936.s002) [file journal.pone.0009936.s002]

| Country       | Circumcision frequency | Year of observation | Refs. (see main article) |
|---------------|------------------------|---------------------|--------------------------|
| Cameroon      | 93.0% a                | 2004                | DHS [89]                 |
| DRC           | 97.4%                  | 2007                | DHS                      |
| Rep. Congo    | 98.4%                  | 2005                | DHS                      |
| CAR           | 93–98% b               |                     | c                        |
| Gabon         | 97–99% b               |                     | c                        |
| Equat. Guinea | 97–99% b               |                     |                          |
| Rwanda        | 9.7%                   | 2005                | DHS                      |
| Burundi       | 8–12% b                |                     |                          |
| Uganda        | 34.7%                  | 2006                | DHS                      |
| Tanzania      | 69.4%                  | 2003                | DHS                      |
| Senegal       | 98.2%                  | 2005                | DHS                      |
| Guinea-Bissau | 79–97%                 | 2000–2006           | [90,91]                  |
| Guinea        | 98.7%                  | 2005                | DHS                      |
| Sierra Leone  | 97–99% b               |                     |                          |
| Liberia       | 97.7%                  | 2007                | DHS                      |
| Côte d'Ivoire | 96.0%                  | 2006                | DHS                      |
| Ghana         | 95.0%                  | 2003                | DHS                      |
| Mali          | 97.7%                  | 2006                | DHS                      |
| Burkina-Faso  | 89.7%                  | 2003                | DHS                      |

**Table S1. Modern levels of male circumcision in relevant countries of Central and West Africa.**

Most data is based on the Demographic and Health Surveys (DHS) [89]. The references cited in this table are listed in the main article.

**a** In the south, southwest, east and center regions it is >97% [89]. **b** Estimate based on the cultural similarity between the ethnic groups, and cultural trends in circumcision, of these countries, and those of neighboring countries for which data is known. **c** For these countries, DHS surveys exist, but they did not survey circumcision.
