# Supplementary material for: High GUD Incidence in the Early 20th Century Created a Particularly Permissive Time Window for the Origin and Initial Spread of Epidemic HIV Strains
Source: PLOS journal article supplement (doi:10.1371/journal.pone.0009936), 2010-04-01
Supplement: S3 (10.1371/journal.pone.0009936.s003) [file journal.pone.0009936.s003]

| Country        | Number of important ethnic groups <sup>a</sup> | Number of ethnic groups with data on circumcision (Revised Atlas) | Number of ethnic groups with data on circumcision after our study <sup>b</sup> |
|----------------|------------------------------------------------|-------------------------------------------------------------------|--------------------------------------------------------------------------------|
| DRC            | 93                                             | 49                                                                | 81                                                                             |
| Rep.Congo      | 17                                             | 6                                                                 | 16                                                                             |
| CAR            | 26                                             | 8                                                                 | 19                                                                             |
| Gabon          | 11                                             | 3                                                                 | 11                                                                             |
| Equat.Guinea   | 7                                              | 3                                                                 | 6                                                                              |
| Cameroon       | 70                                             | 35                                                                | 59                                                                             |
| Senegal        | 11                                             | 8                                                                 | 11                                                                             |
| Guinea-Bissau  | 11                                             | 4                                                                 | 10                                                                             |
| Guinea         | 14                                             | 10                                                                | 13                                                                             |
| Sierra Leone   | 9                                              | 4                                                                 | 9                                                                              |
| Liberia        | 16                                             | 7                                                                 | 15                                                                             |
| Côte d' Ivoire | 33                                             | 15                                                                | 28                                                                             |
| Total          | 318                                            | 152                                                               | 278                                                                            |

**Table S2. The coverage of male circumcision information attained by our ethnographic survey.**

Our ethnographic survey greatly increased coverage of male circumcision information per ethnic group (last column) in relation to the Revised Ethnographic Atlas (Gray 1999) [93]. The references cited in this table are listed in the main article.

<sup>a</sup>The count includes all groups with more than 20,000 people (based on Gordon (2005) [94]), and additional ones for which we gathered information; no group is counted in more than one country in the table. <sup>b</sup>That is, including both the statements about circumcision present in the Revised Ethnographic Atlas (Gray 1999) [93] and those we collected in our survey of additional ethnographic reviews, and primary articles/books (which references are listed in Text S2).
