# Supplementary material for: High GUD Incidence in the Early 20th Century Created a Particularly Permissive Time Window for the Origin and Initial Spread of Epidemic HIV Strains
Source: PLOS journal article supplement (doi:10.1371/journal.pone.0009936), 2010-04-01
Supplement: S4 (10.1371/journal.pone.0009936.s004) [file journal.pone.0009936.s004]

| <b>Ethnic groups</b>                         | <b>Region and country</b>                                    | <b>Killing</b> | <b>Consumption</b> | <b>Time</b> | <b>Refs</b>   |
|----------------------------------------------|--------------------------------------------------------------|----------------|--------------------|-------------|---------------|
| <b>Part I</b>                                | <b>Hunting of chimpanzees and gorillas in Central Africa</b> |                |                    |             |               |
| Ngbandi                                      | Ubangi region, north Democratic Republic of Congo (DRC)      | Yes            | Yes                | 1920–55     | 14            |
| Ngbandi                                      | Ubangi region, north DRC                                     | Yes            | Yes                | 1970        | <b>a</b>      |
| Ngbaka                                       | Northwest DRC                                                | Yes            | Yes                | 1920–55     | 14            |
| Ngombe                                       | Équateur province, DRC                                       | Yes            | Yes                | 1950        | 119, <b>b</b> |
| Mongo                                        | Équateur province, DRC                                       | Yes            | Yes                |             | <b>c</b>      |
| Ngando                                       | Wamba region, central DRC                                    | Seldom         | No                 | 1900–80     | 112           |
| Topoke, Lokele, Mbole, Boyela, Bosaka, Mbesa | Eastern part of Équateur province, DRC                       | Yes            | Yes                |             | 112           |
| Tutsi, Hutu                                  | Rwanda, Burundi                                              |                | No                 | 1910        | 16            |
| Tutsi, Hutu                                  | Rwanda, Burundi                                              |                | No                 | 2000        | 111           |
| Tutsi, Hutu                                  | Burundi                                                      | Seldom         | No                 | 1920        | 113           |
| Twa Pygmies                                  | Virunga mountains, Rwanda                                    | Seldom         | No                 | 1967–82     | 115           |
| Shi-Havu                                     | Bukavu area, east DRC                                        | Seldom         | No                 | 1920        | 114           |
| Tembo                                        | North Kivu region, east DRC                                  | Yes            | Probable           |             | 120           |
| Lega-Mwenga                                  | Mwenga area, east DRC                                        | Yes            | Probable           |             | 120           |
| Mberé                                        | Ewo region, Congo                                            | Probable       |                    | 1955        | 121           |
| Bomitaba                                     | Northeast Congo                                              | Yes            | Yes                | 1920        | 122           |
| Aka Pygmies                                  | North Congo, SW Central African Republic (CAR)               | Yes            | Seldom             | 1995        | 108           |
| Bongili, Kaka, Pomo, Bomali                  | North Congo                                                  | Yes            | Yes                | 1995        | 108           |
| Bomitaba, Bondongo, Kaka, Aka, Bondjo        | Motaba and Likouala aux Herbes regions, north Congo          | Yes, intensely | Yes, favoured      | 1992        | 123, 124      |
| Mbochi, Mboko                                | Cuvette region, Congo                                        | Yes            | Probable           |             | 120           |
| Bomali, Pomo, Kaka                           | Ouessou area, north Congo                                    | Seldom         | Seldom             | 1900        | 118           |
| Bakwele                                      | Northwest Congo                                              | Yes, intensely | Yes, favoured      | 1940–80     | 120, 125      |
| Bakwele, Djem, Fang                          | Northwest Congo                                              | Yes            | Yes                | 2000        | 110           |
| Bakota                                       | Odzala region, Congo                                         | Yes            | Yes                |             | 120           |
| Yombe, Lumbu                                 | West Congo and SW Gabon                                      | Yes            | Yes                |             | 120           |
| Gbaya                                        | Kadei area, west CAR                                         | Yes            | Yes                | 1910        | 16            |
| Mbimou                                       | Nola region, CAR, Yokadouma region, Cameroon                 | Yes, intensely | Yes, favoured      | 1905        | 126           |
| Fang                                         | Northwest Gabon                                              | Yes            | Yes                | 1860–90     | 116, 127      |
| Fang                                         | Moyen Ogooué, Gabon                                          | Yes            | Yes                | 1930        | 128           |
| Fang, Ntumu                                  | Woleu-Ntem region, north Gabon and south Cameroon            | Yes            | Yes                |             | 129           |
| Pahouin group                                | Unspecified location                                         | No             | No                 | 1950        | 130           |
| Mpongwé                                      | Estuaire, litoral Gabon                                      | No             | No                 | 1860        | 116, 117      |
| Orungu                                       | Lower Ogooué, Gabon                                          | Yes            | Probable           |             | 131           |
| Nkomi, Bakalai                               | Lower Ogooué, Gabon                                          | Yes            | Yes                | 1860        | 117           |
| Shekiani, Fang                               | Equatorial Guinea                                            | Yes            | Yes                | 1860        | 117           |
| Beti, Yaunde                                 | Central Cameroon                                             | Yes            | Probable           | 1965        | 40            |
| Beti, Yaunde, Mvele                          | Central Cameroon                                             | Yes            | Yes                | 1920–40     | 129           |
| Bulu                                         | South Cameroon                                               | Yes            | Probable           | 1890        | 127           |
| Bulu                                         | South Cameroon                                               | Yes            | Yes                |             | 120, <b>d</b> |
| Bassa                                        | Nyong-Kelle region, Cameroon                                 | Yes            | Yes                |             | <b>d</b>      |
| Dzimou, Badjoué                              | Dja forest and south central Cameroon                        | Yes            | Yes                | 1920        | 132           |

|                                         |                                                        |                |               |         |          |
|-----------------------------------------|--------------------------------------------------------|----------------|---------------|---------|----------|
| Bomali, Dzimou, Essel, Boman, Konabembé | Moloundou area, SE Cameroon and NW Congo               | Yes            | Yes           | 1910    | 106      |
| Medjimé                                 | Southeast Cameroon                                     | Yes, intensely | Yes, favoured | 1920–40 | 129      |
| Baka Pygmies                            | Southeast Cameroon                                     | Yes            |               | 1940    | 107      |
| Baka Pygmies                            | Southeast Cameroon                                     | Yes            | Seldom        | 2000    | 109, 110 |
| Banen                                   | Bafia region, Cameroon                                 | Seldom         | Seldom        | 1950    | 133      |
| Banyang                                 | West Cameroon                                          | Limited        | Limited       | 1940–60 | 120      |
| Chamba                                  | Faro division, north Cameroon                          | Limited        | Limited       |         | 120      |
| Bamileke                                | Grassfields region, NW Cameroon                        | No             | No            |         | <b>d</b> |
| <b>Part II</b>                          | <b>Hunting of monkeys in West Africa</b>               |                |               |         |          |
| Badyara                                 | Northeast Guinea-Bissau, and nearby Guinea and Senegal | Yes            | Yes           | 1910    | 134      |
| Manjaco                                 | Northwest Guinea-Bissau                                |                | No            | 1955    | 56       |
| Mancanha                                | Northwest Guinea-Bissau                                | Yes            | Yes           | 1940    | 135      |
| Bijagó                                  | Bijagó islands, Guinea-Bissau                          | Yes            | Yes           | 1930    | 30       |
| Coniagui, Bassari                       | Koundara region, Guinea, and southeast Senegal         | Yes            | Yes           | 1910    | 134      |
| Baga                                    | Coastal Guinea                                         | Yes            | Yes           | 1900    | 136      |
| Kpelle                                  | Central Liberia                                        | Yes            | Yes           | 1925    | 26, 137  |
| Sapo                                    | East Liberia                                           | Yes            | Yes           | 1928    | 27       |
| Loma                                    | Loffa region, Liberia                                  | Yes            | Yes           | 1928    | 27       |
| Mano, Gio-Dan                           | Nimba region, Liberia                                  | Yes            | Yes           | 1928    | 27       |
| Beté                                    | Daloa, Gagnoa, and Guiberoa regions, Côte d'Ivoire     | Yes            | Yes           | 1940–60 | 22, 138  |
| Beté                                    | Daloa region, Côte d'Ivoire                            | Yes, intensely | Yes           | 1925    | 139      |
| Niaboua                                 | West central Côte d'Ivoire                             | Yes            | Yes           | 1940    | 138      |
| Krumen                                  | Southwest coast, Côte d'Ivoire                         | Yes            | Yes           | 1940    | 140      |
| Agni                                    | Southeast coast, Côte d'Ivoire                         | Yes, intensely | Yes, favoured | 1890    | 25       |

**Table S3. Killing and consumption of apes/monkeys in Central and West Africa.**

A compilation of ethnographic and other literary references on the hunting of/feeding on: 1) chimpanzees and/or gorillas in Central Africa (Part I); any monkeys in West Africa (Part II). For many ethnic groups/populations, killing of the relevant animals was practiced without eating their meat (e.g., the Aka Pygmies killed apes to supply bushmeat to others; the Tutsi and Hutu did it seldom only to protect crops). For additional information, see Text S2. The references cited in this table are listed in Text S2.

**a** Personal communication from Christiaan Van Goethem (experienced doctor who worked in the DRC). **b** Personal communication from Alvin Wolfe (Northwestern Univ). **c** Personal communication from Honoré Vinck (Aequatoria, Belgium and DRC). **d** Unpublished report supplied by Flavien Ndonko (Gesellschaft für Technische Zusammenarbeit, Yaoundé, Cameroon).
